# Supplementary material for: Effectiveness of behavioural change techniques in physiotherapy interventions to promote physical activity adherence in patients with hip and knee osteoarthritis: a systematic review protocol
Source: PubMed Central journal article supplement — BMJ Open. 2017 Jun 30;7(6):e015833. doi: 10.1136/bmjopen-2017-015833 (PMC5726121; doi:10.1136/bmjopen-2017-015833), 2017-06-30
Supplement: bmjopen-2017-015833.draft_revisions.pdf [file bmjopen-2017-015833.draft_revisions.pdf]

# BMJ Open

## Effectiveness of behaviour change techniques in physiotherapy interventions to promote physical activity adherence in patients with hip and knee osteoarthritis: a systematic review protocol

|                                 |                                                                                                                                                                                                                                                                                                                                                                                                                                                                                                                                                                                                                                                                                                                                                                                                                                                                                                                                        |
|---------------------------------|----------------------------------------------------------------------------------------------------------------------------------------------------------------------------------------------------------------------------------------------------------------------------------------------------------------------------------------------------------------------------------------------------------------------------------------------------------------------------------------------------------------------------------------------------------------------------------------------------------------------------------------------------------------------------------------------------------------------------------------------------------------------------------------------------------------------------------------------------------------------------------------------------------------------------------------|
| Journal:                        | <i>BMJ Open</i>                                                                                                                                                                                                                                                                                                                                                                                                                                                                                                                                                                                                                                                                                                                                                                                                                                                                                                                        |
| Manuscript ID                   | bmjopen-2017-015833                                                                                                                                                                                                                                                                                                                                                                                                                                                                                                                                                                                                                                                                                                                                                                                                                                                                                                                    |
| Article Type:                   | Protocol                                                                                                                                                                                                                                                                                                                                                                                                                                                                                                                                                                                                                                                                                                                                                                                                                                                                                                                               |
| Date Submitted by the Author:   | 03-Jan-2017                                                                                                                                                                                                                                                                                                                                                                                                                                                                                                                                                                                                                                                                                                                                                                                                                                                                                                                            |
| Complete List of Authors:       | <p>Willett, Matthew; University of Birmingham, (1) Centre of Precision Rehabilitation for Spinal Pain (CPR Spine); University of Birmingham, (2) School of Sport, Exercise and Rehabilitation Sciences</p> <p>Duda, Joan; University of Birmingham, Sport, Exercise &amp; Rehabilitation Sciences</p> <p>Gautrey, Charlotte; University of Hertfordshire School of Life and Medical Sciences</p> <p>Fenton, Sally; University of Birmingham, (2) School of Sport, Exercise and Rehabilitation Sciences</p> <p>Greig, Carolyn; School of Sport, Exercise and Rehabilitation Sciences, University of Birmingham, Edgbaston, Birmingham, B15 2TT, UK; MRC-Arthritis Research UK Centre for Musculoskeletal Ageing Research</p> <p>Rushton, Alison; University of Birmingham, (1) Centre of Precision Rehabilitation for Spinal Pain (CPR Spine),; University of Birmingham, (2) School of Sport, Exercise and Rehabilitation Sciences</p> |
| <b>Primary Subject Heading</b>: | Rehabilitation medicine                                                                                                                                                                                                                                                                                                                                                                                                                                                                                                                                                                                                                                                                                                                                                                                                                                                                                                                |
| Secondary Subject Heading:      | Evidence based practice                                                                                                                                                                                                                                                                                                                                                                                                                                                                                                                                                                                                                                                                                                                                                                                                                                                                                                                |
| Keywords:                       | behaviour change, osteoarthritis, systematic review, physiotherapy                                                                                                                                                                                                                                                                                                                                                                                                                                                                                                                                                                                                                                                                                                                                                                                                                                                                     |
|                                 |                                                                                                                                                                                                                                                                                                                                                                                                                                                                                                                                                                                                                                                                                                                                                                                                                                                                                                                                        |

SCHOLARONE™  
Manuscripts

**TITLE**

Effectiveness of behaviour change techniques in physiotherapy interventions to promote physical activity adherence in patients with hip and knee osteoarthritis: a systematic review protocol

**Authors:**

**Corresponding author:** Matthew Willett (MW): m.j.willett.1@bham.ac.uk (1); (+44) 07929260369

Professor Joan Duda (JD)- j.l.duda@bham.ac.uk (1)

Dr Charlotte Gautrey (ChG)- c.n.gautrey@herts.ac.uk (2)

Dr Sally Fenton (SF) - s.a.m.fenton@bham.ac.uk (1)

Dr Carolyn Greig (CaG)- c.a.greig@bham.ac.uk (1)

Dr Alison Rushton (AR)- a.b.rushton@bham.ac.uk (1)

**Authors Affiliations:**

(1) Centre of Precision Rehabilitation for Spinal Pain (CPR Spine)  
School of Sport, Exercise and Rehabilitation Sciences  
University of Birmingham  
Edgbaston  
Birmingham  
United Kingdom  
B15 2TT

(2) School of Sport, Exercise and Rehabilitation Sciences  
University of Birmingham  
Edgbaston  
Birmingham  
United Kingdom  
B15 2TT

(3) School of Life and Medical Sciences  
University of Hertfordshire  
College Lane,  
Hatfield  
United Kingdom  
AL10 9AB

Word Count (excluding title page, abstract, strengths and limitations, references, figures and tables):  
2730 words

**ABSTRACT**

**Introduction:** Osteoarthritis is a common degenerative articular disease, the highest cause of individual level disability and a significant socio-economic burden to healthcare services. Patient

1  
2  
3 education and physical activity prescription are recommended components of interventions in  
4  
5 several healthcare guidelines and are commonly provided by physiotherapists. However, these  
6  
7 interventions lack long term clinical effectiveness. Patient adherence to physical activity prescription  
8  
9 requires patients to modify their physical activity behaviour and appears critical in maintaining  
10  
11 symptomatic improvements. This systematic review aims to evaluate the effectiveness of behaviour  
12  
13 change techniques used in physiotherapy interventions to improve physical activity adherence.

14  
15 **Methods and analysis:** Medline, Cochrane and PEDro registers of Controlled Trials, EMBASE, CINAHL  
16  
17 and PsycInfo databases, and key grey literature sources will be rigorously searched for randomised  
18  
19 controlled trials that compared a physiotherapy intervention incorporating behaviour change  
20  
21 techniques with other therapies, placebo interventions, usual care or no-treatment. Two  
22  
23 independent researchers will conduct literature searches, assess trial eligibility, extract data, conduct  
24  
25 risk of bias assessment (using Cochrane risk of bias tool), classify behaviour change techniques, and  
26  
27 evaluate the quality of the body of literature following Grading of Recommendations, Assessment,  
28  
29 Development and Evaluation guidelines. Narrative synthesis of key outcomes will be presented and  
30  
31 meta-analysis will be performed if included trails are clinically homogenous, based on their  
32  
33 intervention and comparator groups and outcome measures. This review will be reported in line with  
34  
35 the Preferred Reporting Items for Systematic review and Meta-Analysis (PRISMA) guidelines.

36  
37  
38 **Ethics and Dissemination:** Research ethics approval is not required. This review will help inform  
39  
40 clinicians and researchers on the most effective behavioural change techniques used in  
41  
42 physiotherapy interventions to enhance adherence to physical activity prescription for patients with  
43  
44 lower limb osteoarthritis. The findings will be disseminated through publication in a peer reviewed  
45  
46 journal and conference presentations.

47  
48  
49 **Protocol registration number:** PROSPERO CRD42016039932

50  
51  
52 **Key words:** behaviour change, osteoarthritis, systematic review, physiotherapy

53  
54  
55  
56  
57 **Strengths and Limitations of this review:**

- This systematic review will be the first to rigorously search for, and evaluate the effectiveness of, behaviour change techniques, using the behaviour change taxonomy V1, in physiotherapy randomised controlled trials to promote physical activity adherence in patients with lower limb osteoarthritis.
- This research will offer physiotherapists and other clinician's evidence based guidance in selecting behaviour change techniques to enhance adherence to physical activity prescription in lower limb osteoarthritis patients.
- Several heterogenous interventions and comparison groups, variabilities in OA severity, and a limited number of trials are anticipated based on a scoping search. This may preclude meta-analysis, affecting the overall level of evidence for RCT groupings, and therefore not enabling firm conclusions on BCT effectiveness to be established

## BACKGROUND

Osteoarthritis (OA) is a common degenerative disease that causes patients significant pain and reductions in function, social engagement and quality of life<sup>1,2</sup>. OA results in considerable societal healthcare costs and resource utilisation. In the United Kingdom (UK), OA is the most common cause of individual disability, where it is estimated to affect approximately 8.5 million people<sup>3</sup>. Annually, OA symptoms are estimated to be responsible for approximately 2 million general practitioner visits in the UK, with an expenditure totalling 1% of the country's gross national product<sup>3</sup>. OA primarily affects the hip and knee synovial joints, with an overall point prevalence of 11% and 24% respectively<sup>4</sup>.

Healthcare interventions that incorporate education and physical activity (PA)/exercise prescription are recommended for the non-pharmacological management of OA in several international guidelines<sup>1,3,5,6</sup>. Physiotherapists are commonly the primary healthcare practitioner to whom lower

1  
2  
3 limb OA patients are referred and are well placed to deliver these interventions<sup>7,8</sup>. Although  
4  
5 education<sup>9</sup> and PA interventions<sup>10</sup> are effective at reducing short-term OA symptoms and clinical  
6  
7 outcomes, they lack long term effectiveness<sup>11</sup>. With estimates that 50-70% of patients do not comply  
8  
9 with physiotherapy PA recommendations<sup>12,13</sup>, adherence has been identified as a critical reason for  
10  
11 this lack of long term effectiveness<sup>7</sup>. As OA is a life-long condition<sup>14</sup>, with point prevalence and  
12  
13 incidence increasing with age<sup>4</sup>, long-term adherence to PA recommendations is critical to maintain  
14  
15 the short-term improvements seen in a patient's pain<sup>15</sup>, function<sup>16</sup>, and disability<sup>17</sup>.

16  
17  
18  
19 Due to healthcare costs and time constraints, physiotherapy appointments are often limited in  
20  
21 number and focus on short term outcomes only<sup>18</sup>. As there is usually a gradual decrease in clinical  
22  
23 contact time between patient and therapist, long term PA will most likely continue without  
24  
25 supervision in the home/community<sup>19</sup>. As the positive effects of PA reduce if discontinued, and  
26  
27 patient adherence diminishes when physiotherapist supervision ceases<sup>20</sup>, long-term adherence to  
28  
29 recommendations is important and requires patients to change their PA behaviour<sup>20</sup>.

30  
31  
32 Behaviour change interventions incorporate synchronised techniques that target specific patient  
33  
34 health behaviours<sup>21</sup>. Although physiotherapists are encouraged<sup>22,23</sup>, and attempt<sup>24</sup>, to use behaviour  
35  
36 change interventions in their clinical practice, recent evidence suggests that they lack the knowledge  
37  
38 base to do so effectively<sup>24</sup>. Furthermore, a recent systematic review suggested that while  
39  
40 incorporating behaviour change into physiotherapy programmes can enhance patient PA adherence,  
41  
42 the most effective techniques have not been determined<sup>25</sup>. Behaviour change interventions are  
43  
44 usually complex<sup>26</sup> and commonly reported inconsistently in trials<sup>27,28</sup>, making them difficult to  
45  
46 replicate in clinical practice<sup>29</sup>.

47  
48  
49  
50 Incorporating 'active' behavioural techniques (e.g. pacing and self-regulatory skills)<sup>30</sup> into  
51  
52 interventions, which encourage patients to participate in their own symptom management has  
53  
54 demonstrated greater effectiveness than 'passive' techniques<sup>29</sup> (provision of information and advice)  
55  
56 at maintaining PA behaviours on OA patients<sup>7</sup>.

1  
2  
3 Behaviour change techniques (BCTs) are the active components in behaviour change interventions<sup>31</sup>.  
4  
5 Michie et al., (2013, p82) define BCTs, as 'an observable, replicable, and irreducible component of an  
6  
7 intervention designed to alter or redirect causal processes that regulate behaviour' and include  
8  
9 techniques such as 'reinforcement', 'self-monitoring' and 'feedback'. The identification of BCTs has  
10  
11 allowed for specific techniques to be transparently highlighted within interventions and  
12  
13 subsequently demonstrated clinical effectiveness<sup>28</sup>. The Behaviour Change Taxonomy V1<sup>28</sup> has been  
14  
15 developed to help authors identify BCTs and improve consistency of reporting<sup>28</sup>, allowing trials to  
16  
17 comply with CONSORT<sup>32</sup>, Medical Research Council (MRC)<sup>33</sup>, and 'Template for Intervention  
18  
19 Description and Replication' (TIDieR)<sup>34</sup> guidelines for the transparent reporting of interventions.  
20  
21  
22 Identifying BCTs within interventions for patients with chronic conditions is a research priority for  
23  
24 the National Institute of Clinical Excellence (NICE)<sup>31</sup>. Existing PA systematic reviews examining BCTs  
25  
26 have focused on broad patient populations<sup>30-35-39</sup>, cardiovascular disease<sup>40</sup> and rheumatoid arthritis<sup>41</sup>  
27  
28 (RA). To date, one systematic review<sup>38</sup> has examined BCT use in physiotherapy practice. This scoping  
29  
30 review identified 33 BCTs used within self-management interventions treating lower limb OA and  
31  
32 chronic low back pain patients. However, the grey literature was not searched, meaning up to 10%  
33  
34 of eligible trials were not included<sup>42</sup>, and no meta-analysis was conducted due to high intervention  
35  
36 heterogeneity. Furthermore the review did not target a specified health behaviour (PA adherence)  
37  
38 and focussed on group classes only. Physiotherapists most commonly treat lower limb (hip and  
39  
40 knee) OA patients individually (1:1)<sup>43</sup>, and tailoring an intervention to the patients particular  
41  
42 situation is critical to enhance adherence to PA prescription<sup>44</sup>. Furthermore, recent systematic  
43  
44 reviews suggested that 1:1 treatments may provide greater improvements on pain and function than  
45  
46 group classes on Knee OA<sup>45</sup> and RA<sup>41</sup> patients respectively.  
47  
48  
49  
50  
51

52 As the largest healthcare provider of exercise prescription to patients with musculoskeletal pain in  
53  
54 the National Health Service (NHS)<sup>8</sup>, physiotherapists are well placed to deliver interventions that  
55  
56 incorporate behavioural techniques to increase PA adherence. However, at present there is a lack of  
57  
58  
59  
60

1  
2  
3 standardised definitions and understanding of BCTs used in physiotherapy interventions when  
4  
5 treating OA patients.  
6  
7

8 Therefore, the aim of this systematic review is to identify which BCTs used in individual  
9  
10 physiotherapy interventions to improve adherence to PA recommendations are most effective in  
11  
12 treating patients with lower limb (knee and hip) OA symptoms.  
13  
14

## 15 16 17 18 **OBJECTIVES** 19

- 20  
21 1) To identify BCTs used in individual outpatient physiotherapy interventions to increase or maintain PA  
22 adherence outside of the clinic in patients with hip and knee OA.  
23  
24 2) To evaluate the clinical effectiveness (on outcomes of pain, function, quality of life, self-efficacy and  
25 adverse effects) of BCTs used in individual outpatient physiotherapy interventions to increase or  
26 maintain PA adherence outside of the clinic in patients with hip and knee OA.  
27  
28  
29  
30  
31  
32

## 33 34 **METHODS** 35

36 This systematic review will be conducted according to a pre-defined protocol (CRD42016039932)  
37  
38 which complies with recommendations from the Cochrane Collaboration Musculoskeletal group  
39  
40 (CCMG)<sup>46</sup> and Centre of Reviews and Dissemination guidelines<sup>47</sup>, and will be reported following  
41  
42 Preferred Reporting Items for Systematic Reviews and Meta-Analysis (PRISMA) guidelines<sup>48</sup>.  
43  
44  
45

## 46 **Eligibility Criteria** 47

- 48  
49 1) *Trial Design*: Randomised Controlled Trials (RCTs).  
50  
51 2) *Participants*: Adult participants (≥16 years) with hip and/or knee OA. Diagnosis can be based  
52  
53 on acknowledged symptoms, self-reported joint pain, or radiographic evidence due to the  
54  
55 inconsistency of criteria used across guidelines for hip and knee OA diagnosis<sup>4</sup>. RCTs whose  
56  
57 participants have OA with other chronic co-existing articular pathologies<sup>49</sup> that contribute  
58  
59  
60

1  
2  
3 >25% of their population will be excluded<sup>46</sup> (e.g. septic arthritis, inflammatory joint disease,  
4  
5 gout, articular fracture, hemochromatosis). Trials whose participants have had<sup>44 50</sup>, or are  
6  
7 awaiting<sup>8 44</sup>, surgery for OA treatment (e.g. joint Arthroplasty) will be excluded as PA  
8  
9 adherence behaviours in this patient population may be different<sup>51</sup>.  
10

- 11 3) *Interventions*: Any structured outpatient physiotherapy programme that incorporates a BCT  
12  
13 that appears on the V1 Taxonomy<sup>28</sup> as defined by Michie et al., (2013) that focuses on  
14  
15 maintaining or increasing patient PA adherence when away from the physiotherapy clinic  
16  
17 (e.g. at home or in community). BCTs can include, but are not exclusively: 'prompt self-  
18  
19 monitoring of behaviour', 'goal setting', 'social support'<sup>52</sup> and 'reinforcement'<sup>28</sup>. The  
20  
21 intervention must be delivered individually by a physiotherapist (with the profession stated  
22  
23 clearly) although follow up or 'booster' sessions may take different forms (e.g. telephone  
24  
25 calls). Other members of a multidisciplinary team may be involved in any aspect of the  
26  
27 patient's management provided that the physiotherapist is the primary healthcare  
28  
29 professional involved and their role can be established by the researcher. Trials that  
30  
31 incorporate carers or peer support will be included as long as the patient is the primary  
32  
33 target of the physiotherapy intervention.  
34  
35  
36  
37 4) *Comparators*: Other therapies, placebo interventions, 'no treatment', 'usual care' will be  
38  
39 included. RCTs that examined 2 physiotherapy interventions incorporating BCTs will be  
40  
41 included provided that there are different BCTs in each intervention arm, therefore allowing  
42  
43 their effectiveness to be determined. RCTs that include co-interventions will be included if  
44  
45 the comparison group receives the same co-intervention, thereby enabling the effectiveness  
46  
47 of the BCTs to be evaluated.  
48  
49  
50 5) *Outcomes*: All outcome measures.  
51  
52  
53 6) *Language*: Trials that are not written in English will be excluded (at full text stage).  
54  
55  
56  
57

#### 58 Search methods for trial identification



1  
2  
3 Medline (OVID) from 1946, the Cochrane Register of Controlled Trials (CENTRAL) from 1940,  
4  
5 EMBASE from 1946, the Physiotherapy Evidence Data base (PEDro) from 1999, Cumulative Index to  
6  
7 Nursing and Allied Health Literature (CINAHL) from 1937, and PsycInfo (OVID) from 1806, will be  
8  
9 searched<sup>46</sup>. The clinicaltrial.gov trial register and World Health Organisation's (WHO) trial portal will  
10  
11 be searched for relevant trials<sup>46</sup>. Grey literature will be searched on the 'ZETOC' and 'Conference  
12  
13 Proceedings Citation Index' websites. Reference lists of all included trials and relevant review articles  
14  
15 and a citation search using 'web of science' will be conducted. The search strategy for Medline  
16  
17 (Table 1) has been developed in consultation with a subject specific librarian and will be adapted for  
18  
19 use in other databases. Search terms are informed from recent systematic reviews investigating OA<sup>45</sup>  
20  
21 <sup>53 54</sup>, physiotherapy, behavioural and education interventions<sup>9 25 45 53-55</sup>, and the scoping search to  
22  
23 identify keywords in relevant trials<sup>7 56</sup>. RCT filters, as recommended by the Cochrane Collaboration,  
24  
25 will be used to prioritise sensitivity over specificity<sup>42 57-59</sup>.  
26  
27  
28  
29  
30  
31  
32

### 33 Study Selection and Data Management

34  
35 Two independent researchers (MW, ChG) will conduct the initial searches, review abstract and titles,  
36  
37 read the full text of included trials or those where uncertainty remains, review relevant reference  
38  
39 lists, and conduct the citation search. In cases where the two researchers cannot agree on eligibility,  
40  
41 a third researcher (AR, subject and methodological expertise) will mediate. Initial search results will  
42  
43  
44

| 45 Table 1                           | Search strategy to be used for the MEDLINE electronic database                                                                                                                                                                                                      |
|--------------------------------------|---------------------------------------------------------------------------------------------------------------------------------------------------------------------------------------------------------------------------------------------------------------------|
| 46 Database                          | Search Terms                                                                                                                                                                                                                                                        |
| 47 MEDLINE (Ovid)<br>48 1946–present | 49 1) exp osteoarthritis/<br>50 2) osteoarthr\$.tw.<br>51 3) (degenerative adj2 arthritis).tw.<br>52 4) arthrosis.tw.<br>53 5) Or/ 1-4<br>54 6) knee/<br>55 7) exp knee Joint/<br>56 8) knee\$.tw.<br>57 9) hip/<br>58 10) exp hip joint/<br>59 11) hip\$.tw.<br>60 |

- 12) Or/ 6-11  
 13) exp Self Care/  
 14) ((self or symptom\$) adj (care or help or manag\$ or directed or monitor\$ or efficacy or admin\$)).tw.  
 15) Patient Education as Topic/  
 16) ((health or patient\$) adj2 (educat\$ or information)).tw.  
 17) exp Consumer Participation/  
 18) ((patient\$ or consumer\$) adj part\$).tw.  
 19) "Power (Psychology)"/  
 20) empower\$.tw.  
 21) Holistic Health/  
 22) (holistic or wholistic).tw.  
 23) "activities of daily living"/  
 24) (activit\$ adj2 daily adj living).tw  
 25) social support/  
 26) (social adj (support or network\$)).tw.  
 27) (support adj system\$).tw.  
 28) exp Adaptation, Psychological/  
 29) (psychologic\$ adj (adjust\$ or adapt\$)).tw.  
 30) (cope or copes or coping).tw.  
 31) exp Behavior Therapy/ or exp cognitive therapy/ or self manage\$.ti.  
 32) (adapt\$ adj behav\$).tw.  
 33) (behav\$ adj (therap\$ or intervention\$)).tw.  
 34) health education/ or self efficacy/ or Exercise/ or health behavior/  
 35) compliance/ or patient compliance/  
 36) conditioning, operant/  
 37) exp "Reinforcement (Psychology)"/  
 38) operant conditioning.mp.  
 39) respondent treatment.mp.  
 40) relaxation.mp. or exp Relaxation/  
 41) graded activity.mp.  
 42) health promotion/  
 43) (psycholog\* technique or behavio?r technique).mp.  
 44) behavio?r Change.mp.  
 45) self efficacy.mp.  
 46) Motivation/ or motivation\*.mp.  
 47) primary prevention/  
 48) Psychology.mp. or Psychology/  
 49) Adherence.mp.  
 50) Or/ 13-49  
 51) exp Physical Therapy Modalities/  
 52) physiotherap\$.tw.  
 53) (physiotherap\$ or physical therap\$ or pt).mp.  
 54) physiotherap\$.mp.  
 55) kinesiotherap\$.tw.  
 56) exp Rehabilitation/  
 57) rehab\$.tw  
 58) Physical Activity.mp.  
 59) Or/ 51- 58  
 60) randomi?ed controlled trial.pt.  
 61) controlled clinical trial.pt.  
 62) randomi?ed.ab.  
 63) placebo.ab.  
 64) drug therapy.fs.  
 65) randomly.ab.  
 66) trial.ab.  
 67) groups.ab.  
 68) Or/ 60-67

|  |                                   |
|--|-----------------------------------|
|  | 69) exp animals/ not humans.sh.   |
|  | 70) 68 not 69                     |
|  | 71) 5 and 12 and 50 and 59 and 70 |

be uploaded to Refworks prior to the review of titles and abstracts. Included trials will be managed through Endnote. A PRISMA flow chart will be used to provide transparency of the number of trials included or excluded at each stage.

### Data Collection Process and Analyses

Two independent researchers (MW, SF) will use a standardised data extraction form developed from the Cochrane Back and Neck group template to record information on participants, trial setting, eligibility criteria, risk of bias assessment, methodology design, Intervention, outcome measures, assessment time points, and the main results<sup>60</sup>. The data extraction form will be piloted on the full texts of several included RCTs to ensure reliability and will be altered as necessary to optimise data collection. Any disagreement between researchers will be resolved through discussion. If agreement cannot be reached, a third reviewer (AR) will mediate. Where there are multiple reports of the same trial, data will be extracted using separate forms and collated on a single form subsequently<sup>60</sup>. Trial authors will be contacted by email if information is missing or unclear.

Two independent researchers (MW, SF) will code interventions using the 'Behaviour Change Taxonomy'<sup>28</sup>. The researchers will undergo online training on the use of the taxonomy and the coding process will be piloted a priori. Any disagreement between the researchers will be resolved by researcher consensus. In the event that consensus cannot be reached, a mediator (JD, expertise in subject area of behaviour change) will finalise the decision (Objective 1).

### Risk of Bias assessment

1  
2  
3 Two independent researchers (MW, SF) will use the Cochrane Risk of Bias tool to assess the internal  
4 validity of included trials<sup>61</sup>. The tool was developed by a research working group and is  
5 recommended for use in systematic reviews. It uses domain based evaluation rather than a check list  
6 or scoring system to assess internal validity<sup>61</sup> and allows review authors space to justify their  
7 conclusions<sup>62</sup>. The tool addresses six domains: 'sequence generation', 'allocation concealment',  
8 'blinding', 'incomplete outcome data', and 'selective outcome reporting' and 'other' sources of bias.  
9 A judgement of 'High', 'Unclear' or 'Low' risk of bias will be made for each domain. A judgement of  
10 'Unclear' will be allocated to a domain where insufficient information is provided. Trials will be  
11 screened for selective outcome reporting by comparing outcomes used in the finalised articles with  
12 registered protocols. If no trial protocol exists, outcomes from the trials published methods and  
13 results sections will be compared and a judgement of 'unclear' will be allocated<sup>48</sup>. When assessing  
14 trials risk of bias, researchers will pay special attention to the 'blinding' domain. Blinding of the  
15 treating physiotherapists and trial participants is often problematic however assessor blinding is  
16 achievable and important<sup>61</sup>. Therefore, trials will be judged to have overall 'low risk' for the blinding  
17 domain if the assessor is adequately blinded<sup>61</sup>. The risk of bias assessment across trials will be  
18 displayed graphically using REVMAN 5.3.  
19  
20  
21  
22  
23  
24  
25  
26  
27  
28  
29  
30  
31  
32  
33  
34  
35  
36  
37  
38  
39  
40

#### 41 **Data Presentation**

42  
43  
44 A table will be presented that details the BCTs used in each trial. The total number of BCTs  
45 (individually and groupings) used across trials and their frequency per trial will be reported  
46 (Objective 1)<sup>38</sup>. A 'characteristics of included trials' table with PICOS data, and a 'risk of bias' table  
47 showing internal validity decisions within and across trials will also be presented.  
48  
49  
50  
51  
52  
53  
54

#### 55 **Data synthesis:**

1  
2  
3 Narrative synthesis will be reported following stages as recommended by Cochrane Qualitative  
4  
5 Research Group<sup>63</sup>.  
6  
7  
8  
9

10 **Developing a preliminary synthesis:** Trials ( $\geq 2$ ) will be grouped together if they are clinically  
11  
12 homogenous as determined by two researchers (MW, SF), based on:  
13

- 14 • Interventions: specific BCTs with or without co-interventions
- 15
- 16 • Comparator groups
- 17
- 18 • Outcome measure domains<sup>64</sup>
- 19

20  
21 The results of groupings will be presented in tables (Objective 1).  
22

23 **Assessing the robustness of the synthesis:** Each table and statement will include information  
24  
25 detailing overall quality of evidence for each grouping. The quality of the body of evidence for each  
26  
27 outcome will be evaluated using the GRADE approach (Grading of Recommendations, Assessment,  
28  
29 Development and Evaluation)<sup>65</sup>. GRADE determines overall quality of evidence based on risk of bias,  
30  
31 inconsistency, indirectness, imprecision of results and publication bias<sup>65</sup>. The quality of evidence will  
32  
33 be adjudicated as 'high', 'moderate', 'low' or 'very low' based on the guidance from the GRADE  
34  
35 working group by two researchers (MW, SF)<sup>65</sup>, with a third researcher (AR) asked to mediate if  
36  
37 consensus cannot be reached.  
38  
39

40  
41 **Exploring Relationships within and Between Trials:** Further textual descriptions will accompany the  
42  
43 tables to highlight key points on BCTs identified, trial populations, interventions or outcomes that  
44  
45 may explain differences in results.  
46  
47  
48  
49

## 50 51 **Meta-analysis**

52  
53 Based on the scoping search, it is anticipated that eligible trials will demonstrate high intervention,  
54  
55 comparator and outcome variability (clinical heterogeneity)<sup>64</sup>. Therefore, when meta-analysis is  
56  
57 indicated, a random effects model will be used to calculate effect sizes based on the groupings  
58  
59  
60

1  
2  
3 outlined in the narrative synthesis (Objective 2). The risk ratio (RR) with 95% confidence intervals  
4 (CIs) and mean differences (MD) with 95% confidence intervals will be used to measure the  
5 treatment effect of dichotomous and continuous outcomes respectively. The standardised mean  
6 difference (SMD) will be used to measure continuous outcomes where several measures are used  
7 within one outcome domain<sup>64</sup>. Where mean data are not available, and trial authors do not respond  
8 to an email request for raw data (a maximum of three follow up emails), the median will be used as  
9 an estimate of the mean<sup>66</sup>.  
10  
11  
12  
13  
14  
15  
16  
17  
18  
19

### 20 **Sensitivity Analysis**

21  
22 A sensitivity analysis will be conducted to determine whether excluding high risk of bias RCTs has  
23 influenced the findings of the meta-analysis to enable discussion (Objective 2).  
24  
25  
26  
27

### 28 **Meta-bias**

29  
30  
31 Publication bias will be assessed by use of funnel plots where meta-analysis includes  $\geq 10$  trials<sup>67</sup>.  
32  
33  
34 Meta-analyses will be tested for 'small-study effects' by comparing fixed and random effects sizes  
35 where the random-effects model will show greater intervention effect sizes for trials with smaller  
36 sample sizes<sup>67</sup>.  
37  
38  
39  
40  
41  
42  
43

### 44 **DISCUSSION**

45  
46  
47 OA patients currently display the highest level of individual level disability in the United Kingdom.  
48  
49 Interventions incorporating BCTS have the potential to increase long term patient adherence to PA  
50 recommendations, increasing patient function and quality of life, and physiotherapists are well  
51 placed to deliver them. At present, there is a lack of understanding of specific BCTs used in  
52 physiotherapy interventions when treating OA patients. This review will help identify BCTs currently  
53  
54  
55  
56  
57  
58  
59  
60

1  
2  
3 being used in physiotherapy clinical practice and recommend those which are the most effective at  
4  
5 reducing lower limb OA symptoms and encouraging long term patient PA adherence. Clinicians will  
6  
7 be able to apply the evidence from this systematic review on OA patients by incorporating the most  
8  
9 appropriate BCTs into their interventions to maximise their adherence to PA. This systematic review  
10  
11 will also inform the planning and implementation of a trial to determine the feasibility of an active  
12  
13 behavioural physiotherapy intervention on patients with lower limb osteoarthritis.  
14  
15

## 16 17 18 19 20 **LIMITATIONS**

21  
22 Several heterogenous interventions, comparison groups, variability of OA severity and time periods,  
23  
24 and a limited number of trials (15-20) are anticipated based on the scoping search. This may  
25  
26 preclude meta-analysis, affecting the overall level of evidence for RCT groupings, and therefore not  
27  
28 enabling firm conclusions on BCT effectiveness to be established.  
29  
30

## 31 32 33 34 35 **ETHICS AND DISSEMINATION:**

36  
37 No research ethics approval is required for this systematic review as no confidential patient data will  
38  
39 be used. It is intended that the results of this systematic review will be disseminated through  
40  
41 publication in a peer reviewed journal and conference presentations.  
42  
43  
44  
45  
46  
47

48  
49 **Contributors** All authors conceived the focus of the systematic review. MW is a PhD student and AR  
50  
51 (lead supervisor), JD, and CaG are supervisors. MW drafted the initial version of the protocol  
52  
53 manuscript. AR, CaG and JD provided critical guidance on the direction, methodological decisions,  
54  
55 and proposed analyses. MW developed the search strategy and data extraction form that was  
56  
57  
58  
59  
60

1  
2  
3 piloted by MW and ChG/SF respectively. All authors reviewed and commented on each draft of the  
4  
5 systematic review protocol. MW is the guarantor of the review.  
6  
7

8 **Funding** This research received no specific grant from any funding agency in the public, commercial  
9  
10 or not-for-profit sectors.  
11

12  
13 **Competing interests** None declared  
14

15  
16 **Provenance and peer review** Not commissioned; externally peer reviewed  
17

18  
19 **Data sharing statement** This systematic review protocol was registered with the International  
20  
21 Prospective Register of Systematic Reviews (PROSPERO) on 15/8/2016 Registration number:  
22  
23 CRD42016039932. This protocol has been reported using the Preferred Reporting Items for  
24  
25 Systematic Reviews and Meta-Analyses Protocols (PRISMA-P) guidelines. The final version of this  
26  
27 systematic review and its associated data will be published upon completion.  
28  
29

30  
31 **Open Access** This is an Open Access article distributed in accordance with the Creative Commons  
32  
33 Attribution Non Commercial (CC BY-NC 4.0) license, which permits others to distribute, remix, adapt,  
34  
35 build upon this work non-commercially, and license their derivative works on different terms,  
36  
37 provided the original work is properly cited and the use is non-commercial. See:  
38  
39 <http://creativecommons.org/licenses/by-nc/4.0/>.  
40  
41  
42  
43  
44

#### 45 REFERENCES:

- 46  
47 1. Fernandes L, Hagen KB, Bijlsma JW, et al. EULAR recommendations for the non-pharmacological  
48 core management of hip and knee osteoarthritis. *Ann Rheum Dis* 2013;72(7):1125-35. doi:  
49 10.1136/annrheumdis-2012-202745  
50 2. Helminen EE, Sinikallio SH, Valjakka AL, et al. Effectiveness of a cognitive-behavioural group  
51 intervention for knee osteoarthritis pain: a randomized controlled trial. *Clin Rehabil*  
52 2015;29(9):868-81. doi: 10.1177/0269215514558567  
53 3. NICE. Osteoarthritis. Care and Management in adults. Clinical guideline CG177 Methods, evidence  
54 and recommendations. *National Institute for Health and Care Excellence* 2014;2014  
55 4. Pereira D, Peleteiro B, Araujo J, et al. The effect of osteoarthritis definition on prevalence and  
56 incidence estimates: a systematic review. *Osteoarthritis Cartilage* 2011;19(11):1270-85. doi:  
57 10.1016/j.joca.2011.08.009  
58  
59  
60



- 1  
2  
3 5. Hochberg MC, Altman RD, April KT, et al. American College of Rheumatology 2012  
4 recommendations for the use of nonpharmacologic and pharmacologic therapies in  
5 osteoarthritis of the hand, hip, and knee. *Arthritis Care & Research* 2012;64(4):465-74. doi:  
6 10.1002/acr.21596
- 7  
8 6. McAlindon TE, Bannuru RR, Sullivan MC, et al. OARSI guidelines for the non-surgical management  
9 of knee osteoarthritis. *Osteoarthritis Cartilage* 2014;22(3):363-88. doi:  
10 10.1016/j.joca.2014.01.003
- 11 7. Pisters MF, Veenhof C, de Bakker DH, et al. Behavioural graded activity results in better exercise  
12 adherence and more physical activity than usual care in people with osteoarthritis: a cluster-  
13 randomised trial. *Journal of Physiotherapy* 2010;56(1):41-47. doi: 10.1016/s1836-  
14 9553(10)70053-9
- 15 8. Foster NE, Healey EL, Holden MA, et al. A multicentre, pragmatic, parallel group, randomised  
16 controlled trial to compare the clinical and cost-effectiveness of three physiotherapy-led  
17 exercise interventions for knee osteoarthritis in older adults: the BEEP trial protocol. *BMC*  
18 *Musculoskeletal Disorders* 2014;15:254. doi: 10.1186/1471-2474-15-254
- 19 9. Kroon FPB, Van der Burg L, Buchbinder R, et al. Self-management education programmes for  
20 osteoarthritis (Review). *The Cochrane Library* 2014
- 21 10. Pisters MF, Veenhof C, Schellevis FG, et al. Long-term effectiveness of exercise therapy in  
22 patients with osteoarthritis of the hip or knee: a randomized controlled trial comparing two  
23 different physical therapy interventions. *Osteoarthritis Cartilage* 2010;18(8):1019-26. doi:  
24 10.1016/j.joca.2010.05.008
- 25 11. Bennell KL, Dobson F, Hinman RS. Exercise in osteoarthritis: moving from prescription to  
26 adherence. *Best Pract Res Clin Rheumatol* 2014;28(1):93-117. doi:  
27 10.1016/j.berh.2014.01.009
- 28 12. Beinart NA, Goodchild CE, Weinman JA, et al. Individual and intervention-related factors  
29 associated with adherence to home exercise in chronic low back pain: a systematic review.  
30 *Spine J* 2013;13(12):1940-50. doi: 10.1016/j.spinee.2013.08.027
- 31 13. Bassett SF. The assessment of patient adherence to physiotherapy rehabilitation. *New Zealand*  
32 *Journal of Physiotherapy* 2003;31(2):60-66.
- 33 14. Thorstensson CA, Garellick G, Rystedt H, et al. Better Management of Patients with  
34 Osteoarthritis: Development and Nationwide Implementation of an Evidence-Based  
35 Supported Osteoarthritis Self-Management Programme. *Musculoskeletal Care*  
36 2015;13(2):67-75. doi: 10.1002/msc.1085
- 37 15. Thomas KS, Muir KR, Doherty M, et al. Home based exercise programme for knee pain and knee  
38 osteoarthritis: randomised controlled trial. *BMJ* 2002;325:752-56.
- 39 16. Dunlop DD, Semanik P, Song J, et al. Risk factors for functional decline in older adults with  
40 arthritis. *Arthritis Rheum* 2005;52(4):1274-82. doi: 10.1002/art.20968
- 41 17. Marks R, Allegrante JP. Chronic osteoarthritis and adherence to exercise: a review of the  
42 literature. *Journal of aging and physical activity* 2005;13(4):434-60.
- 43 18. Holden MA, Nicholls EE, Hay EM, et al. Physical therapists' use of therapeutic exercise for  
44 patients with clinical knee osteoarthritis in the United Kingdom: in line with current  
45 recommendations? *Physical Therapy* 2008;88(10):1109-21.
- 46 19. Van Gool CH, Penninx BW, Kempen GI, et al. Effects of exercise adherence on physical function  
47 among overweight older adults with knee osteoarthritis. *Arthritis Rheum* 2005;53(1):24-32.  
48 doi: 10.1002/art.20902
- 49 20. Hinman RS, Delany CM, Campbell PK, et al. About Working Together to Promote Exercise  
50 Patients With Knee Osteoarthritis: Qualitative Study Physical Therapists, Telephone Coaches,  
51 and Adherence. *Physical Therapy* 2015;96(4):479-93. doi: 10.2522/ptj.20150260
- 52 21. Michie S, van Stralen MM, West R. The behaviour change wheel: a new method for  
53 characterising and designing behaviour change interventions. *Implement Sci* 2011;6:42. doi:  
54 10.1186/1748-5908-6-42
- 55  
56  
57  
58  
59  
60

- 1
- 2
- 3 22. DOH. The NHS knowledge skills framework and the development review process. *NHS* 2004;2004
- 4 23. HCPC. Standards of proficiency for physiotherapists. *NHS* 2013;2013:1-18.
- 5 24. Alexanders J, Anderson A, Henderson S. Musculoskeletal physiotherapists' use of psychological
- 6 interventions: a systematic review of therapists' perceptions and practice. *Physiotherapy*
- 7 2015;101(2):95-102. doi: 10.1016/j.physio.2014.03.008
- 8 25. McGrane N, Galvin R, Cusack T, et al. Addition of motivational interventions to exercise and
- 9 traditional physiotherapy: a review and meta-analysis. *Physiotherapy* 2015;101(1):1-12. doi:
- 10 10.1016/j.physio.2014.04.009
- 11 26. Craig P, Dieppe P, Macintyre S, et al. Developing and evaluating complex interventions: the new
- 12 Medical Research Council guidance. *BMJ* 2008;337:a1655. doi: 10.1136/bmj.a1655
- 13 27. Michie S, Johnston M, Francis J, et al. From Theory to Intervention: Mapping Theoretically
- 14 Derived Behavioural Determinants to Behaviour Change Techniques. *Applied Psychology*
- 15 2008;57(4):660-80. doi: 10.1111/j.1464-0597.2008.00341.x
- 16 28. Michie S, Richardson M, Johnston M, et al. The behavior change technique taxonomy (v1) of 93
- 17 hierarchically clustered techniques: building an international consensus for the reporting of
- 18 behavior change interventions. *Ann Behav Med* 2013;46(1):81-95. doi: 10.1007/s12160-013-
- 19 9486-6
- 20 29. Albarracin D, Gillette JC, Earl AN, et al. A test of major assumptions about behavior change: a
- 21 comprehensive look at the effects of passive and active HIV-prevention interventions since
- 22 the beginning of the epidemic. *Psychol Bull* 2005;131(6):856-97. doi: 10.1037/0033-
- 23 2909.131.6.856
- 24 30. Michie S, Abraham C, Whittington C, et al. Effective Techniques in Healthy Eating and Physical
- 25 Activity Interventions: A Meta-Regression. *Health Psychology* 2009;28(6):690-701. doi:
- 26 10.1037/a0016136.supp
- 27 31. NICE. PH49 Behaviour change: individual approaches *National Institute for Health and Care*
- 28 *Excellence* 2014
- 29 32. Boutron I, Moher D, Altman DG, et al. Extending the CONSORT statement to randomized trials of
- 30 non-pharmacologic treatment: Explanation and Elaboration. *Ann Intern Med*
- 31 2008;148(4):295-309.
- 32 33. Craig P, Dieppe P, Macintyre S, et al. Developing and evaluating complex interventions: new
- 33 guidance. *Medical Research Council* 2008
- 34 34. Hoffmann TC, Glasziou PP, Boutron I, et al. Better reporting of interventions: template for
- 35 intervention description and replication (TIDieR) checklist and guide. *BMJ* 2014;348:g1687.
- 36 doi: 10.1136/bmj.g1687
- 37 35. Bird EL, Baker G, Mutrie N, et al. Behavior change techniques used to promote walking and
- 38 cycling: a systematic review. *Health Psychol* 2013;32(8):829-38. doi: 10.1037/a0032078
- 39 36. French DP, Olander EK, Chisholm A, et al. Which behaviour change techniques are most effective
- 40 at increasing older adults' self-efficacy and physical activity behaviour? A systematic review.
- 41 *Ann Behav Med* 2014;48(2):225-34. doi: 10.1007/s12160-014-9593-z
- 42 37. Plow MA, Moore S, Husni ME, et al. A systematic review of behavioural techniques used in
- 43 nutrition and weight loss interventions among adults with mobility-impairing neurological
- 44 and musculoskeletal conditions. *Obes Rev* 2014;15(12):945-56. doi: 10.1111/obr.12223
- 45 38. Keogh A, Tully MA, Matthews J, et al. A review of behaviour change theories and techniques
- 46 used in group based self-management programmes for chronic low back pain and arthritis.
- 47 *Man Ther* 2015 doi: 10.1016/j.math.2015.03.014
- 48 39. O'Brien N, McDonald S, Araujo-Soares V, et al. The features of interventions associated with
- 49 long-term effectiveness of physical activity interventions in adults aged 55-70 years: a
- 50 systematic review and meta-analysis. *Health Psychol Rev* 2015;9(4):417-33. doi:
- 51 10.1080/17437199.2015.1012177
- 52
- 53
- 54
- 55
- 56
- 57
- 58
- 59
- 60

- 1  
2  
3 40. Heron N, Kee F, Donnelly M, et al. Behaviour change techniques in home-based cardiac  
4 rehabilitation: a systematic review. *Br J Gen Pract* 2016;66(651):e747-57. doi:  
5 10.3399/bjgp16X686617  
6  
7 41. Cramp F, Berry J, Gardiner M, et al. Health behaviour change interventions for the promotion of  
8 physical activity in rheumatoid arthritis: a systematic review. *Musculoskeletal Care*  
9 2013;11(4):238-47. doi: 10.1002/msc.1049  
10  
11 42. Lefebvre C, Manheimer E, Glanville J. Chapter 6: Searching for studies. In: Higgins JPT, Green S  
12 (editors). *Cochrane Handbook for Systematic Reviews of Interventions* Version 5.1.0  
13 (updated March 2011). The Cochrane Collaboration, 2011. Available from  
14 [www.handbook.cochrane.org](http://www.handbook.cochrane.org) (accessed 1/12/2016)  
15  
16 43. Tiffreau V, Mullemanb D, Coudeyrec E, et al. The value of individual or collective group exercise  
17 programs for knee or hip osteoarthritis. Elaboration of French clinical practice guidelines.  
18 *Annales de réadaptation et de médecine physique* 2007;50:741-46. doi:  
19 10.1016/j.annrmp.2007.10.001  
20  
21 44. Jordan JL, Holden MA, Mason EEJ, et al. Interventions to improve adherence to exercise for  
22 chronic musculoskeletal pain in adults. *The Cochrane Library* 2010(1) doi:  
23 10.1002/14651858.CD005956.pub2  
24  
25 45. Fransen M, McConnell S, Harmer AR, et al. Exercise for osteoarthritis of the knee. *Cochrane*  
26 *Database of Systematic Reviews* 2015;2015(1) doi: 10.1002/14651858.CD004376.pub3.  
27  
28 46. Ghogomu EA, Maxwell LJ, Buchbinder R, et al. Updated method guidelines for cochrane  
29 musculoskeletal group systematic reviews and metaanalyses. *J Rheumatol* 2014;41(2):194-  
30 205. doi: 10.3899/jrheum.121306  
31  
32 47. CRD. Centre for Reviews and Dissemination (CRD). *Systematic reviews: CRD's guidance for*  
33 *undertaking reviews in healthcare*. 3rd ed. York: CRD University of York, York Publishing  
34 Services Ltd; 2009.  
35  
36 48. Shamseer L, Moher D, Clarke M, et al. Preferred reporting items for systematic review and meta-  
37 analysis protocols (PRISMA-P) 2015: elaboration and explanation. *BMJ* 2015;349:g7647. doi:  
38 10.1136/bmj.g7647  
39  
40 49. McAlindon TE, Driban JB, Henrotin Y, et al. OARSI Clinical Trials Recommendations: Design,  
41 conduct, and reporting of clinical trials for knee osteoarthritis. *Osteoarthritis Cartilage*  
42 2015;23(5):747-60. doi: 10.1016/j.joca.2015.03.005  
43  
44 50. Brand E, Nyland J, Henzman C, et al. Arthritis Self-Efficacy Scale scores in knee osteoarthritis: a  
45 systematic review and meta-analysis comparing arthritis self-management education with or  
46 without exercise. *Journal of Orthopaedic and Sports Physiotherapy* 2013;43(12):895-910.  
47 doi: 10.2519/  
48  
49 51. Dobson F, Bennell K, French S. Barriers and Facilitators to Exercise Participation in People with  
50 Hip and/or Knee Osteoarthritis: Synthesis of the Literature Using Behavior Change Theory.  
51 *American Journal of physical medicine and rehabilitation* 2016;95(5):372-389.  
52  
53 52. Marley J, Tully MA, Porter-Armstrong A, et al. A systematic review of interventions aimed at  
54 increasing physical activity in adults with chronic musculoskeletal pain: protocol. *Systematic*  
55 *Reviews* 2014;3(1):106.  
56  
57 53. Fransen M, McConnell S, Hernandez-Molina G, et al. Exercise for osteoarthritis of the hip  
58 *Cochrane Database of Systematic Reviews* 2014;2014(4) doi:  
59 10.1002/14651858.CD007912.pub2.  
60  
61 54. French HP, Galvin RP, Abbott JH, et al. Adjunctive therapies in addition to land-based exercise  
62 therapy for osteoarthritis of the hip or knee (Protocol). *The Cochrane Library* 2015(10)  
63  
64 55. Toomey E, Currie-Murphy L, Matthews J, et al. The effectiveness of physiotherapist-delivered  
65 group education and exercise interventions to promote self-management for people with  
66 osteoarthritis and chronic low back pain: a rapid review part I. *Man Ther* 2015;20(2):265-86.  
67 doi: 10.1016/j.math.2014.10.013

- 1  
2  
3 56. Veenhof C, Koke AJ, Dekker J, et al. Effectiveness of behavioral graded activity in patients with  
4 osteoarthritis of the hip and/or knee: A randomized clinical trial. *Arthritis Rheum*  
5 2006;55(6):925-34. doi: 10.1002/art.22341  
6  
7 57. Wong SS, Wilczynski NL, Haynes RB. Developing optimal search strategies for detecting clinically  
8 sound treatment studies in EMBASE. *Journal of the Medical Library Association*  
9 2006;94(1):41-47.  
10  
11 58. Wong SS, Wilczynski NL, Haynes RB. Optimal CINAHL search strategies for identifying therapy  
12 studies and review articles. *Journal of Nursing Scholarship* 2006;38(2):194-9.  
13  
14 59. Eady AM, Wilczynski NL, Haynes RB. PsycINFO search strategies identified methodologically  
15 sound therapy studies and review articles for use by clinicians and researchers. *Journal of*  
16 *Clinical Epidemiology* 2008;61(1):34-40.  
17  
18 60. Higgins JPT, Deeks JJ. Chapter 7: Selecting studies and collecting data. In: Higgins JPT, Green S  
19 (editors), *Cochrane Handbook for Systematic Reviews of Interventions Version 5.1.0*  
20 (updated March 2011). The Cochrane Collaboration, 2011. Available  
21 from: [www.handbook.cochrane.org](http://www.handbook.cochrane.org) (accessed 1/12/2016)  
22  
23 61. Higgins JPT, Altman DG, Sterne JAC. Chapter 8: Assessing risk of bias in included studies. In:  
24 Higgins JPT, Green S (editors). *Cochrane Handbook for Systematic Reviews of Interventions*  
25 *Version 5.1.0* (updated March 2011). The Cochrane Collaboration, 2011. Available  
26 from: [www.handbook.cochrane.org](http://www.handbook.cochrane.org) (accessed 1/12/2016)  
27  
28 62. Liberati A, Altman DG, Tetzlaff J, et al. The PRISMA statement for reporting systematic reviews  
29 and meta-analyses of studies that evaluate healthcare interventions: explanation and  
30 elaboration. *BMJ* 2009;339:b2700. doi: 10.1136/bmj.b2700  
31  
32 63. Popay J, Roberts H, Sowden A, et al. Guidance on the conduct of narrative synthesis in systematic  
33 reviews. A Product from the ESRC Methods Programme. Version 1. *ESRC* 2006:1-91.  
34  
35 64. Deeks JJ, Higgins JPT, Altman DG. (editors). Chapter 9: Analysing data and undertaking meta-  
36 analyses. In: Higgins JPT, Green S (editors). *Cochrane Handbook for Systematic Reviews of*  
37 *Interventions Version 5.1.0* (updated March 2011). The Cochrane Collaboration, 2011.  
38 Available from [www.handbook.cochrane.org](http://www.handbook.cochrane.org) (accessed 1/12/2016)  
39  
40 65. Schünemann HJ, Oxman AD, Vist GE, et al. Chapter 12: Interpreting results and drawing  
41 conclusions. In: Higgins JPT, Green S (editors), *Cochrane Handbook for Systematic Reviews of*  
42 *Interventions Version 5.1.0* (updated March 2011). The Cochrane Collaboration, 2011.  
43 Available from [www.handbook.cochrane.org](http://www.handbook.cochrane.org) (accessed 1/12/2016)  
44  
45 66. Hozo SP, Djulbegovic B, Hozo I. Estimating the mean and variance from the median, range, and  
46 the size of a sample. *BMC Med Res Methodol* 2005;5:13. doi: 10.1186/1471-2288-5-13  
47  
48 67. Sterne JA, Sutton AJ, Ioannidis JP, et al. Recommendations for examining and interpreting funnel  
49 plot asymmetry in meta-analyses of randomised controlled trials. *BMJ* 2011;343:d4002. doi:  
50 10.1136/bmj.d4002  
51  
52  
53  
54  
55  
56  
57  
58  
59  
60

## RESEARCH CHECKLIST

**PRISMA-P (Preferred Reporting Items for Systematic review and Meta-Analysis Protocols) 2015 checklist: recommended items to address in a systematic review protocol\***

| Section and topic                 | Item No | Checklist item                                                                                                                                                                                                                                           |
|-----------------------------------|---------|----------------------------------------------------------------------------------------------------------------------------------------------------------------------------------------------------------------------------------------------------------|
| <b>ADMINISTRATIVE INFORMATION</b> |         |                                                                                                                                                                                                                                                          |
| Title:                            |         |                                                                                                                                                                                                                                                          |
| Identification                    | 1a      | Identify the report as a protocol of a systematic review: <b>Included on page 1, 2, 6, 15</b>                                                                                                                                                            |
| Update                            | 1b      | If the protocol is for an update of a previous systematic review, identify as such <b>N/A</b>                                                                                                                                                            |
| Registration                      | 2       | If registered, provide the name of the registry (such as PROSPERO) and registration number: <b>Included on Page 1,2,15</b>                                                                                                                               |
| Authors:                          |         |                                                                                                                                                                                                                                                          |
| Contact                           | 3a      | Provide name, institutional affiliation, e-mail address of all protocol authors; provide physical mailing address of corresponding author: <b>Included on Page 1</b>                                                                                     |
| Contributions                     | 3b      | Describe contributions of protocol authors and identify the guarantor of the review: <b>Included on Page 14, 15</b>                                                                                                                                      |
| Amendments                        | 4       | If the protocol represents an amendment of a previously completed or published protocol, identify as such and list changes; otherwise, state plan for documenting important protocol amendment: <b>N/A</b>                                               |
| Support:                          |         |                                                                                                                                                                                                                                                          |
| Sources                           | 5a      | Indicate sources of financial or other support for the review: <b>Included on Page 15</b>                                                                                                                                                                |
| Sponsor                           | 5b      | Provide name for the review funder and/or sponsor: <b>N/A</b>                                                                                                                                                                                            |
| Role of sponsor or funder         | 5c      | Describe roles of funder(s), sponsor(s), and/or institution(s), if any, in developing the protocol: <b>N/A</b>                                                                                                                                           |
| <b>INTRODUCTION</b>               |         |                                                                                                                                                                                                                                                          |
| Rationale                         | 6       | Describe the rationale for the review in the context of what is already known: <b>Included pages 3-6</b>                                                                                                                                                 |
| Objectives                        | 7       | Provide an explicit statement of the question(s) the review will address with reference to participants, interventions, comparators, and outcomes (PICO): <b>Included pages 6-7</b>                                                                      |
| <b>METHODS</b>                    |         |                                                                                                                                                                                                                                                          |
| Eligibility criteria              | 8       | Specify the study characteristics (such as PICO, study design, setting, time frame) and report characteristics (such as years considered, language, publication status) to be used as criteria for eligibility for the review: <b>Included pages 6-7</b> |
| Information sources               | 9       | Describe all intended information sources (such as electronic databases, contact with study authors, trial registers or other grey literature sources) with planned dates of coverage: <b>Included on pages 8-10</b>                                     |
| Search strategy                   | 10      | Present draft of search strategy to be used for at least one electronic database, including planned limits, such that it could                                                                                                                           |



|                                    |     |                                                                                                                                                                                                                                                                                  |
|------------------------------------|-----|----------------------------------------------------------------------------------------------------------------------------------------------------------------------------------------------------------------------------------------------------------------------------------|
|                                    |     | be repeated: <b>Included Pages 8-10</b>                                                                                                                                                                                                                                          |
| Study records:                     |     |                                                                                                                                                                                                                                                                                  |
| Data management                    | 11a | Describe the mechanism(s) that will be used to manage records and data throughout the review: <b>Included on Page 10</b>                                                                                                                                                         |
| Selection process                  | 11b | State the process that will be used for selecting studies (such as two independent reviewers) through each phase of the review (that is, screening, eligibility and inclusion in meta-analysis): <b>Included on pages 10-13.</b>                                                 |
| Data collection process            | 11c | Describe planned method of extracting data from reports (such as piloting forms, done independently, in duplicate), any processes for obtaining and confirming data from investigators: <b>Included on pages 10</b>                                                              |
| Data items                         | 12  | List and define all variables for which data will be sought (such as PICO items, funding sources), any pre-planned data assumptions and simplifications: <b>Included on pages 10</b>                                                                                             |
| Outcomes and prioritization        | 13  | List and define all outcomes for which data will be sought, including prioritization of main and additional outcomes, with rationale: <b>Included Page 6,7</b>                                                                                                                   |
| Risk of bias in individual studies | 14  | Describe anticipated methods for assessing risk of bias of individual studies, including whether this will be done at the outcome or study level, or both; state how this information will be used in data synthesis: <b>Included pages 11, 13</b>                               |
| Data synthesis                     | 15a | Describe criteria under which study data will be quantitatively synthesised: <b>Included Pages 12-13</b>                                                                                                                                                                         |
|                                    | 15b | If data are appropriate for quantitative synthesis, describe planned summary measures, methods of handling data and methods of combining data from studies, including any planned exploration of consistency (such as $I^2$ , Kendall's $\tau$ ): <b>Included on Pages 12-13</b> |
|                                    | 15c | Describe any proposed additional analyses (such as sensitivity or subgroup analyses, meta-regression): <b>Included on Page 13</b>                                                                                                                                                |
|                                    | 15d | If quantitative synthesis is not appropriate, describe the type of summary planned: <b>Included page 11-12.</b>                                                                                                                                                                  |
| Meta-bias(es)                      | 16  | Specify any planned assessment of meta-bias(es) (such as publication bias across studies, selective reporting within studies): <b>Included pages 11,13</b>                                                                                                                       |
| Confidence in cumulative evidence  | 17  | Describe how the strength of the body of evidence will be assessed (such as GRADE): <b>Included on pages 12</b>                                                                                                                                                                  |

**\* It is strongly recommended that this checklist be read in conjunction with the PRISMA-P Explanation and Elaboration (cite when available) for important clarification on the items. Amendments to a review protocol should be tracked and dated. The copyright for PRISMA-P (including checklist) is held by the PRISMA-P Group and is distributed under a Creative Commons Attribution Licence 4.0.**

*From: Shamseer L, Moher D, Clarke M, Ghersi D, Liberati A, Petticrew M, Shekelle P, Stewart L, PRISMA-P Group. Preferred reporting items for systematic review and meta-analysis protocols (PRISMA-P) 2015: elaboration and explanation. BMJ. 2015 Jan 2;349(jan02 1):g7647.*

# BMJ Open

## Effectiveness of behaviour change techniques in physiotherapy interventions to promote physical activity adherence in patients with hip and knee osteoarthritis: a systematic review protocol

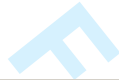

|                                 |                                                                                                                                                                                                                                                                                                                                                                                                                                                                                                                                                                                                                                                                                                                                                                                                                                                                                                                                                                                                                                                                                                                  |
|---------------------------------|------------------------------------------------------------------------------------------------------------------------------------------------------------------------------------------------------------------------------------------------------------------------------------------------------------------------------------------------------------------------------------------------------------------------------------------------------------------------------------------------------------------------------------------------------------------------------------------------------------------------------------------------------------------------------------------------------------------------------------------------------------------------------------------------------------------------------------------------------------------------------------------------------------------------------------------------------------------------------------------------------------------------------------------------------------------------------------------------------------------|
| Journal:                        | <i>BMJ Open</i>                                                                                                                                                                                                                                                                                                                                                                                                                                                                                                                                                                                                                                                                                                                                                                                                                                                                                                                                                                                                                                                                                                  |
| Manuscript ID                   | bmjopen-2017-015833.R1                                                                                                                                                                                                                                                                                                                                                                                                                                                                                                                                                                                                                                                                                                                                                                                                                                                                                                                                                                                                                                                                                           |
| Article Type:                   | Protocol                                                                                                                                                                                                                                                                                                                                                                                                                                                                                                                                                                                                                                                                                                                                                                                                                                                                                                                                                                                                                                                                                                         |
| Date Submitted by the Author:   | 06-Apr-2017                                                                                                                                                                                                                                                                                                                                                                                                                                                                                                                                                                                                                                                                                                                                                                                                                                                                                                                                                                                                                                                                                                      |
| Complete List of Authors:       | <p>Willett, Matthew; University of Birmingham, Centre of Precision Rehabilitation for Spinal Pain (CPR Spine); University of Birmingham, School of Sport, Exercise and Rehabilitation Sciences</p> <p>Duda, Joan; University of Birmingham, School of Sport, Exercise and Rehabilitation Sciences; University of Birmingham, MRC-Arthritis Research UK Centre for Musculoskeletal Ageing Research</p> <p>Gautrey, Charlotte; University of Hertfordshire School of Life and Medical Sciences</p> <p>Fenton, Sally; University of Birmingham, School of Sport, Exercise and Rehabilitation Sciences; University of Birmingham, MRC-Arthritis Research UK Centre for Musculoskeletal Ageing Research</p> <p>Greig, Carolyn; University of Birmingham, School of Sport, Exercise and Rehabilitation Sciences; University of Birmingham, MRC-Arthritis Research UK Centre for Musculoskeletal Ageing Research</p> <p>Rushton, Alison; University of Birmingham, Centre of Precision Rehabilitation for Spinal Pain (CPR Spine),; University of Birmingham, School of Sport, Exercise and Rehabilitation Sciences</p> |
| <b>Primary Subject Heading</b>: | Rehabilitation medicine                                                                                                                                                                                                                                                                                                                                                                                                                                                                                                                                                                                                                                                                                                                                                                                                                                                                                                                                                                                                                                                                                          |
| Secondary Subject Heading:      | Evidence based practice                                                                                                                                                                                                                                                                                                                                                                                                                                                                                                                                                                                                                                                                                                                                                                                                                                                                                                                                                                                                                                                                                          |
| Keywords:                       | behaviour change, osteoarthritis, systematic review, physiotherapy                                                                                                                                                                                                                                                                                                                                                                                                                                                                                                                                                                                                                                                                                                                                                                                                                                                                                                                                                                                                                                               |
|                                 |                                                                                                                                                                                                                                                                                                                                                                                                                                                                                                                                                                                                                                                                                                                                                                                                                                                                                                                                                                                                                                                                                                                  |

SCHOLARONE™  
Manuscripts

**TITLE**

Effectiveness of behaviour change techniques in physiotherapy interventions to promote physical activity adherence in patients with hip and knee osteoarthritis: a systematic review protocol

**Authors:**

**Corresponding author:** Matthew Willett,<sup>1,2</sup> (MW): m.j.willett.1@bham.ac.uk: (+44) 07929260369

Professor Joan Duda,<sup>2,3</sup> (JD)- j.l.duda@bham.ac.uk

Dr Charlotte Gautrey,<sup>4</sup> (ChG)- c.n.gautrey@herts.ac.uk

Dr Sally Fenton,<sup>2</sup> (SF) - s.a.m.fenton@bham.ac.uk

Dr Carolyn Greig,<sup>2,3</sup> (CaG)- c.a.greig@bham.ac.uk

Dr Alison Rushton,<sup>1,2</sup> (AR)- a.b.rushton@bham.ac.uk

**Authors Affiliations:**

(1) Centre of Precision Rehabilitation for Spinal Pain (CPR Spine)  
School of Sport, Exercise and Rehabilitation Sciences  
University of Birmingham  
Edgbaston  
Birmingham  
United Kingdom  
B15 2TT

(2) School of Sport, Exercise and Rehabilitation Sciences  
University of Birmingham  
Edgbaston  
Birmingham  
United Kingdom  
B15 2TT

(3) MRC-Arthritis Research UK Centre for Musculoskeletal Ageing Research  
University of Birmingham  
Edgbaston  
Birmingham  
B15 2TT

(4) School of Life and Medical Sciences  
University of Hertfordshire  
College Lane,  
Hatfield  
United Kingdom  
AL10 9AB

Word Count (excluding title page, abstract, strengths and limitations, references, figures and tables):  
3590 words



**ABSTRACT**

**Introduction:** Osteoarthritis is a common degenerative articular disease, the highest cause of individual level disability and a significant socio-economic burden to healthcare services. Patient education and physical activity prescription are recommended components of interventions in several healthcare guidelines and are commonly provided by physiotherapists. However, these interventions lack long term clinical effectiveness. Patient adherence to physical activity prescription requires patients to modify their physical activity behaviour and appears critical in maintaining symptomatic improvements. This systematic review aims to evaluate the effectiveness of behaviour change techniques used in physiotherapy interventions to improve physical activity adherence.

**Methods and analysis:** Medline, Cochrane and PEDro registers of Controlled Trials, EMBASE, CINAHL and PsycInfo databases, and key grey literature sources will be rigorously searched for randomised controlled trials that compared a physiotherapy intervention incorporating behaviour change techniques with other therapies, placebo interventions, usual care or no-treatment. Two independent researchers will conduct literature searches, assess trial eligibility, extract data, conduct risk of bias assessment (using Cochrane risk of bias tool), classify behaviour change techniques, and evaluate the quality of the body of literature following Grading of Recommendations, Assessment, Development and Evaluation guidelines. Narrative synthesis of key outcomes will be presented and meta-analysis will be performed if included trials are clinically homogenous, based on their intervention and comparator groups and outcome measures. This review will be reported in line with the Preferred Reporting Items for Systematic review and Meta-Analysis (PRISMA) guidelines.

**Ethics and Dissemination:** Research ethics approval is not required. This review will help inform clinicians and researchers on the most effective behavioural change techniques used in physiotherapy interventions to enhance adherence to physical activity prescription for patients with lower limb osteoarthritis. The findings will be disseminated through publication in a peer reviewed journal and conference presentations.

**Protocol registration number:** PROSPERO CRD42016039932

1  
2  
3 **Key words:** behaviour change, osteoarthritis, systematic review, physiotherapy  
4  
5  
6

7 **Strengths and Limitations of this review:**  
8

- 9
- 10 • This systematic review will be the first to rigorously search for, and evaluate the effectiveness  
11 of, behaviour change techniques, using the behaviour change taxonomy V1, in physiotherapy  
12 randomised controlled trials to promote physical activity adherence in patients with lower  
13 limb osteoarthritis.  
14
  - 15 • This research will offer physiotherapists and other clinician's evidence based guidance in  
16 selecting behaviour change techniques to enhance adherence to physical activity  
17 prescription in lower limb osteoarthritis patients.  
18
  - 19 • Several heterogeneous interventions and comparison groups, variabilities in OA severity,  
20 and a limited number of trials are anticipated based on a scoping search. This may preclude  
21 meta-analysis, affecting the overall level of evidence for RCT groupings, and therefore not  
22 enabling firm conclusions on BCT effectiveness to be established  
23  
24  
25  
26  
27  
28  
29  
30  
31  
32
- 33  
34  
35  
36

37 **BACKGROUND**  
38

39  
40 Osteoarthritis (OA) is a common degenerative disease that causes patients significant pain and  
41 reductions in function, social engagement and quality of life<sup>1,2</sup>. OA results in considerable societal  
42 healthcare costs and resource utilisation. In the United Kingdom (UK), OA is the most common cause  
43 of individual disability, where it is estimated to affect approximately 8.5 million people<sup>3</sup>. Annually,  
44 OA symptoms are estimated to be responsible for approximately 2 million general practitioner visits  
45 in the UK, with an expenditure totalling 1% of the country's gross national product<sup>3</sup>. OA primarily  
46 affects the hip and knee synovial joints, with an overall point prevalence of 11% and 24%  
47 respectively<sup>4</sup>.  
48  
49  
50  
51  
52  
53  
54  
55  
56  
57  
58  
59  
60

1  
2  
3 Healthcare interventions that incorporate education and physical activity (PA)/exercise prescription  
4  
5 are recommended for the non-pharmacological management of OA in several international  
6  
7 guidelines<sup>1 3 5 6</sup>. Physiotherapists are commonly the primary healthcare practitioner to whom lower  
8  
9 limb OA patients are referred and are well placed to deliver these interventions<sup>7 8</sup>. Although  
10  
11 education<sup>9</sup> and PA interventions<sup>10</sup> are effective at reducing short-term OA symptoms and clinical  
12  
13 outcomes, they lack long term effectiveness<sup>11</sup>. With estimates that 50-70% of patients do not comply  
14  
15 with physiotherapy PA recommendations<sup>12 13</sup>, adherence has been identified as a critical reason for  
16  
17 this lack of long term effectiveness<sup>7</sup>. As OA is a life-long condition<sup>14</sup>, with point prevalence and  
18  
19 incidence increasing with age<sup>4</sup>, long-term adherence to PA recommendations is critical to maintain  
20  
21 the short-term improvements seen in a patient's pain<sup>15</sup>, function<sup>16</sup>, and disability<sup>17</sup>.

22  
23  
24  
25 Due to healthcare costs and time constraints, physiotherapy appointments are often limited in  
26  
27 number and focus on short term outcomes only<sup>18</sup>. As there is usually a gradual decrease in clinical  
28  
29 contact time between patient and therapist, long term PA will most likely continue without  
30  
31 supervision in the home/community<sup>19</sup>. As the positive effects of PA reduce if discontinued, and  
32  
33 patient adherence diminishes when physiotherapist supervision ceases<sup>20</sup>, long-term adherence to  
34  
35 recommendations is important and requires patients to change and sustain this change in PA  
36  
37 behaviour<sup>20</sup>.

38  
39  
40  
41 Despite the importance of monitoring PA adherence, at present there is limited evidence to suggest  
42  
43 the most appropriate outcomes to measure the maintenance of PA in lower limb OA patients<sup>21</sup>. A  
44  
45 recent systematic review concluded that no recommendations could be made for any PA adherence  
46  
47 outcomes in chronic musculoskeletal pain patients<sup>22</sup> due to methodological issues with diagnostic  
48  
49 accuracy trial design. Furthermore, none of the seven outcomes identified in the review were  
50  
51 validated on OA patients. A further systematic review identified PA adherence measures used in self-  
52  
53 management interventions for patients with musculoskeletal pain<sup>23</sup>. Six of the 47 trials in the review  
54  
55  
56  
57  
58  
59  
60

1  
2  
3 included lower limb OA participants, with three of these incorporating exercise diaries and three a  
4  
5 multi-item measure to measure PA adherence<sup>23</sup>.  
6

7  
8 Behaviour change interventions incorporate synchronised techniques that target specific patient  
9  
10 health behaviours<sup>24</sup>. Behaviour change interventions are usually complex<sup>25</sup> and commonly reported  
11  
12 inconsistently in trials<sup>26,27</sup>, making them difficult to replicate in clinical practice<sup>28</sup>.  
13

14  
15 Incorporating 'active' behavioural techniques (e.g, pacing and self-regulatory skills)<sup>29</sup> into  
16  
17 interventions, which encourage patients to participate in their own symptom management has  
18  
19 demonstrated greater effectiveness than 'passive' techniques<sup>28</sup> (provision of information and advice)  
20  
21 at maintaining PA behaviours on OA patients<sup>7</sup>.  
22

23  
24 Behaviour change techniques (BCTs) are the active components in behaviour change interventions<sup>30</sup>.  
25  
26 Michie et al., (2013, p82) define BCTs, as 'an observable, replicable, and irreducible component of an  
27  
28 intervention designed to alter or redirect causal processes that regulate behaviour' and include  
29  
30 techniques such as 'reinforcement', 'self-monitoring' and 'feedback'. The identification of BCTs has  
31  
32 allowed for specific techniques to be transparently highlighted within interventions and  
33  
34 subsequently demonstrated clinical effectiveness<sup>27</sup>.  
35  
36

37  
38 Intervention fidelity is the degree to which an intervention's active ingredients are delivered as  
39  
40 intended<sup>31</sup>. Intervention fidelity assessment is especially important in behavioural change  
41  
42 interventions as it can help determine whether the treatment effect is due to the interacting BCTs or  
43  
44 from a variation in the delivery of the intervention protocol<sup>32,33</sup>. The Behaviour Change Taxonomy  
45  
46 V1<sup>27</sup> has been developed to help authors identify BCTs and improve consistency of reporting<sup>27</sup>,  
47  
48 allowing trials to comply with CONSORT<sup>34</sup>, Medical Research Council (MRC)<sup>35</sup>, and 'Template for  
49  
50 Intervention Description and Replication' (TIDieR)<sup>36</sup> guidelines for the transparent reporting of  
51  
52 interventions and its use should therefore improve intervention fidelity assessment.  
53  
54  
55  
56  
57  
58  
59  
60

Existing PA systematic reviews examining BCTs have focused on broad patient populations<sup>29 37-43</sup>, diabetes<sup>44</sup>, cardiovascular disease<sup>45</sup> and rheumatoid arthritis<sup>46</sup> (RA). To date, only one systematic review<sup>40</sup> has examined BCT use in physiotherapy practice treating lower limb OA and chronic low back pain patients with an associated paper assessing each trial's intervention fidelity<sup>33</sup>. This scoping review identified 33 BCTs used within physiotherapy self-management interventions with no trial (out of n=22) demonstrating 'high' treatment fidelity (>80% of components present)<sup>33</sup>. Therefore individual BCT effectiveness was difficult to measure and meta-analysis was not conducted.

Furthermore, the grey literature was not searched, meaning up to 10% of eligible trials were not included<sup>47</sup>, the review did not target a specified health behaviour (PA adherence), and focussed on group classes only. Physiotherapists most commonly treat lower limb (hip and knee) OA patients individually (1:1)<sup>48</sup>, and tailoring an intervention to the patients particular situation is critical to enhance adherence to PA prescription<sup>49</sup>. Furthermore, recent systematic reviews suggested that 1:1 treatments may provide greater improvements on pain and function than group classes on Knee OA<sup>50</sup> and RA<sup>46</sup> patients respectively.

Identifying effective BCTs within interventions for patients with chronic conditions is a research priority for the National Institute of Clinical Excellence (NICE) with 'social support', 'feedback and monitoring', and 'goals and planning', suggested as integral components of programmes to support PA behavioural change<sup>30</sup>. Additionally, in systematic reviews of PA behaviours<sup>38 43 44</sup>, the BCTs' 'instruction on how to perform the behaviour', 'demonstration of the behaviour', 'problem solving' and 'use of follow up prompts' have been identified as strategies within effective interventions.

As the largest healthcare provider of exercise prescription to patients with musculoskeletal pain in the National Health Service (NHS)<sup>8</sup>, physiotherapists are well placed to deliver interventions that incorporate BCTs. However, physiotherapists need to increase their understanding of patients' PA behaviours and motivations to enhance adherence to their recommendations<sup>51</sup>. Although physiotherapists are encouraged<sup>52 53</sup>, and attempt<sup>54</sup>, to use behaviour change interventions in their clinical practice, recent evidence suggests that they lack the knowledge base to do so effectively<sup>54</sup>. A

1  
2  
3 recent systematic review suggested that while incorporating behaviour change into physiotherapy  
4 programmes can enhance patient PA adherence, the most effective BCTs have not been  
5 determined<sup>55</sup>. Furthermore, there is a lack of standardised definitions and understanding of BCTs  
6 used in physiotherapy interventions when treating OA patients.  
7  
8  
9

10  
11 Therefore, the aim of this systematic review is to identify which BCTs used in individual  
12 physiotherapy interventions to improve adherence to PA recommendations are most effective in  
13 treating patients with lower limb (knee and hip) OA symptoms.  
14  
15  
16  
17  
18  
19

## 20 21 **OBJECTIVES**

- 22  
23 1) To identify BCTs used in individual outpatient physiotherapy interventions to increase or maintain PA  
24 adherence outside of the clinic in patients with hip and knee OA.  
25  
26
- 27  
28 2) To evaluate the clinical effectiveness (on outcomes of PA, adherence, pain, function, quality of life,  
29 self-efficacy and adverse effects) of BCTs used in individual outpatient physiotherapy interventions to  
30 increase or maintain PA adherence outside of the clinic in patients with hip and knee OA.  
31  
32  
33  
34  
35

## 36 37 **METHODS**

38  
39 This systematic review will be conducted according to a pre-defined protocol (CRD42016039932)  
40 which complies with recommendations from the Cochrane Collaboration Musculoskeletal group  
41 (CCMG)<sup>56</sup> and Centre of Reviews and Dissemination guidelines<sup>57</sup>, and will be reported following  
42 Preferred Reporting Items for Systematic Reviews and Meta-Analysis (PRISMA) guidelines<sup>58</sup>.  
43  
44  
45  
46  
47

## 48 49 **Eligibility Criteria**

- 50  
51 1) *Trial Design*: Randomised Controlled Trials (RCTs) including protocols, results and fidelity  
52 papers where available.  
53  
54  
55  
56  
57  
58  
59  
60

- 1  
2  
3 2) *Participants*: Adult participants ( $\geq 18$  years) with hip and/or knee OA. Diagnosis can be based  
4 on acknowledged symptoms, self-reported joint pain, or radiographic evidence due to the  
5 inconsistency of criteria used across guidelines for hip and knee OA diagnosis<sup>4</sup>. RCTs whose  
6 participants have OA with other chronic co-existing articular pathologies<sup>59</sup> that contribute  
7 >25% of their population will be excluded<sup>56</sup> (e.g. septic arthritis, inflammatory joint disease,  
8 gout, articular fracture, hemochromatosis). Trials whose participants have had<sup>49 60</sup>, or are  
9 awaiting<sup>8 49</sup>, surgery for OA treatment (e.g. joint Arthroplasty) will be excluded as PA  
10 adherence behaviours in this patient population may be different<sup>61</sup>.  
11  
12 3) *Interventions*: Any structured outpatient physiotherapy programme that incorporates a BCT  
13 that appears on the V1 Taxonomy<sup>27</sup> as defined by Michie et al., (2013) that focuses on  
14 maintaining or increasing patient PA adherence when away from the physiotherapy clinic  
15 (e.g. at home or in community). BCTs can include, but are not exclusively: 'prompt self-  
16 monitoring of behaviour', 'goal setting', 'social support'<sup>62</sup> and 'reinforcement'<sup>27</sup>. The  
17 intervention must be delivered individually by a physiotherapist (with the profession stated  
18 clearly) although follow up or 'booster' sessions may take different forms (e.g. telephone  
19 calls). Other members of a multidisciplinary team may be involved in any aspect of the  
20 patient's management provided that the physiotherapist is the primary healthcare  
21 professional involved and their role can be established by the researcher. Trials that  
22 incorporate carers or peer support will be included as long as the patient is the primary  
23 target of the physiotherapy intervention.  
24  
25 4) *Comparators*: Other therapies, placebo interventions, 'no treatment', 'usual care' will be  
26 included. RCTs that examined 2 physiotherapy interventions incorporating BCTs will be  
27 included provided that there are different BCTs in each intervention arm, therefore allowing  
28 their effectiveness to be determined. RCTs that include co-interventions will be included if  
29 the comparison group receives the same co-intervention, thereby enabling the effectiveness  
30 of the BCTs to be evaluated.  
31  
32  
33  
34  
35  
36  
37  
38  
39  
40  
41  
42  
43  
44  
45  
46  
47  
48  
49  
50  
51  
52  
53  
54  
55  
56  
57  
58  
59  
60

- 1  
2  
3 5) *Outcomes*: It is preferable for trials to have measured PA adherence. Therefore, the main  
4  
5 outcomes of interest include PA (e.g. pedometers, self-report questionnaires)<sup>21</sup> and  
6  
7 adherence measures (e.g. exercise diaries)<sup>23</sup>, although other clinical outcomes of  
8  
9 effectiveness (pain, function, quality of life, self-efficacy and adverse effects) will be  
10  
11 considered provided they are collected with validated measures<sup>49</sup>. A note will be made  
12  
13 during data extraction whether the trial measured PA adherence specifically and this will  
14  
15 interpreted in the discussion section. Only trials that measured PA adherence will be  
16  
17 considered for meta-analysis.  
18  
19  
20 6) *Language*: Trials that are not written in English will be excluded (at full text stage).  
21  
22  
23  
24

#### 25 **Search methods for trial identification**

26  
27 Medline (OVID) from 1946, the Cochrane Register of Controlled Trials (CENTRAL) from 1940,  
28  
29 EMBASE from 1946, the Physiotherapy Evidence Data base (PEDro) from 1999, Cumulative Index to  
30  
31 Nursing and Allied Health Literature (CINAHL) from 1937, and PsycInfo (OVID) from 1806, will be  
32  
33 searched<sup>56</sup>. The clinicaltrial.gov trial register and World Health Organisation's (WHO) trial portal will  
34  
35 be searched for relevant trials<sup>56</sup>. Grey literature will be searched on the 'ZETOC' and 'Conference  
36  
37 Proceedings Citation Index' websites. Reference lists of all included trials and relevant review articles  
38  
39 and a citation search using 'web of science' will be conducted. The search strategy for Medline  
40  
41 (Table 1) has been developed in consultation with a subject specific librarian and will be adapted for  
42  
43 use in other databases. Search terms are informed from recent systematic reviews investigating OA<sup>50</sup>  
44  
45 <sup>63 64</sup>, physiotherapy, behavioural and education interventions<sup>9 50 55 63-65</sup>, and the scoping search to  
46  
47 identify keywords in relevant trials<sup>7 66</sup>. RCT filters, as recommended by the Cochrane Collaboration,  
48  
49 will be used to prioritise sensitivity over specificity<sup>47 67-69</sup>.  
50  
51  
52  
53  
54  
55  
56

#### 57 **Study Selection and Data Management**

58  
59  
60 9



Two independent researchers (MW, ChG) will conduct the initial searches, review abstract and titles, read the full text of included trials or those where uncertainty remains, review relevant reference lists, and conduct the citation search. In cases where the two researchers cannot agree on eligibility, a third researcher (AR, subject and methodological expertise) will mediate. Initial search results will

| Table 1                        | Search strategy to be used for the MEDLINE electronic database                                                                                                                                                                                                                                                                                                                                                                                                                                                                                                                                                                                                                                                                                                                                                                                                                                                                                                                                                                                                                                                                                                                                                                                                                                                                                                                                                                                                                                                                                                                                                                                                                                                                                                                                                                                                                                                                                                                         |
|--------------------------------|----------------------------------------------------------------------------------------------------------------------------------------------------------------------------------------------------------------------------------------------------------------------------------------------------------------------------------------------------------------------------------------------------------------------------------------------------------------------------------------------------------------------------------------------------------------------------------------------------------------------------------------------------------------------------------------------------------------------------------------------------------------------------------------------------------------------------------------------------------------------------------------------------------------------------------------------------------------------------------------------------------------------------------------------------------------------------------------------------------------------------------------------------------------------------------------------------------------------------------------------------------------------------------------------------------------------------------------------------------------------------------------------------------------------------------------------------------------------------------------------------------------------------------------------------------------------------------------------------------------------------------------------------------------------------------------------------------------------------------------------------------------------------------------------------------------------------------------------------------------------------------------------------------------------------------------------------------------------------------------|
| Database                       | Search Terms                                                                                                                                                                                                                                                                                                                                                                                                                                                                                                                                                                                                                                                                                                                                                                                                                                                                                                                                                                                                                                                                                                                                                                                                                                                                                                                                                                                                                                                                                                                                                                                                                                                                                                                                                                                                                                                                                                                                                                           |
| MEDLINE (Ovid)<br>1946–present | <ol style="list-style-type: none"> <li>1) exp osteoarthritis/</li> <li>2) osteoarthr\$.tw.</li> <li>3) (degenerative adj2 arthritis).tw.</li> <li>4) arthrosis.tw.</li> <li>5) Or/ 1-4</li> <li>6) knee/</li> <li>7) exp knee Joint/</li> <li>8) knee\$.tw.</li> <li>9) hip/</li> <li>10) exp hip joint/</li> <li>11) hip\$.tw.</li> <li>12) Or/ 6-11</li> <li>13) exp Self Care/</li> <li>14) ((self or symptom\$) adj (care or help or manag\$ or directed or monitor\$ or efficacy or admin\$)).tw.</li> <li>15) Patient Education as Topic/</li> <li>16) ((health or patient\$) adj2 (educat\$ or information)).tw.</li> <li>17) exp Consumer Participation/</li> <li>18) ((patient\$ or consumer\$) adj part\$).tw.</li> <li>19) "Power (Psychology)"/</li> <li>20) empower\$.tw.</li> <li>21) Holistic Health/</li> <li>22) (holistic or wholistic).tw.</li> <li>23) "activities of daily living"/</li> <li>24) (activit\$ adj2 daily adj living).tw</li> <li>25) social support/</li> <li>26) (social adj (support or network\$)).tw.</li> <li>27) (support adj system\$).tw.</li> <li>28) exp Adaptation, Psychological/</li> <li>29) (psychologic\$ adj (adjust\$ or adapt\$)).tw.</li> <li>30) (cope or copes or coping).tw.</li> <li>31) exp Behavior Therapy/ or exp cognitive therapy/ or self manage\$.ti.</li> <li>32) (adapt\$ adj behav\$).tw.</li> <li>33) (behav\$ adj (therap\$ or intervention\$)).tw.</li> <li>34) health education/ or self efficacy/ or Exercise/ or health behavior/</li> <li>35) compliance/ or patient compliance/</li> <li>36) conditioning, operant/</li> <li>37) exp "Reinforcement (Psychology)"/</li> <li>38) operant conditioning.mp.</li> <li>39) respondent treatment.mp.</li> <li>40) relaxation.mp. or exp Relaxation/</li> <li>41) graded activity.mp.</li> <li>42) health promotion/</li> <li>43) (psycholog* technique or behavio?r technique).mp.</li> <li>44) behavio?r Change.mp.</li> <li>45) self efficacy.mp.</li> </ol> |

- |    |  |
|----|--|
| 1  |  |
| 2  |  |
| 3  |  |
| 4  |  |
| 5  |  |
| 6  |  |
| 7  |  |
| 8  |  |
| 9  |  |
| 10 |  |
| 11 |  |
| 12 |  |
| 13 |  |
| 14 |  |
| 15 |  |
| 16 |  |
| 17 |  |
| 18 |  |
| 19 |  |
| 20 |  |
| 21 |  |
| 22 |  |
| 23 |  |
| 24 |  |
| 25 |  |
| 26 |  |
| 27 |  |
| 28 |  |
| 29 |  |
| 30 |  |
| 31 |  |
| 32 |  |
| 33 |  |
| 34 |  |
| 35 |  |
| 36 |  |
| 37 |  |
| 38 |  |
| 39 |  |
| 40 |  |
| 41 |  |
| 42 |  |
| 43 |  |
| 44 |  |
| 45 |  |
| 46 |  |
| 47 |  |
| 48 |  |
| 49 |  |
| 50 |  |
| 51 |  |
| 52 |  |
| 53 |  |
| 54 |  |
| 55 |  |
| 56 |  |
| 57 |  |
| 58 |  |
| 59 |  |
| 60 |  |
| 61 |  |
| 62 |  |
| 63 |  |
| 64 |  |
| 65 |  |
| 66 |  |
| 67 |  |
| 68 |  |
| 69 |  |
| 70 |  |
| 71 |  |
- 46) Motivation/ or motivation\*.mp.  
 47) primary prevention/  
 48) Psychology.mp. or Psychology/  
 49) Adherence.mp.  
 50) Or/ 13-49  
 51) exp Physical Therapy Modalities/  
 52) physiotherap\$.tw.  
 53) (physiotherap\$ or physical therap\$ or pt).mp.  
 54) physiotherap\$.mp.  
 55) kinesiotherap\$.tw.  
 56) exp Rehabilitation/  
 57) rehab\$.tw  
 58) Physical Activity.mp.  
 59) Or/ 51- 58  
 60) randomi?ed controlled trial.pt.  
 61) controlled clinical trial.pt.  
 62) randomi?ed.ab.  
 63) placebo.ab.  
 64) drug therapy.fs.  
 65) randomly.ab.  
 66) trial.ab.  
 67) groups.ab.  
 68) Or/ 60-67  
 69) exp animals/ not humans.sh.  
 70) 68 not 69  
 71) 5 and 12 and 50 and 59 and 70

be uploaded to Refworks prior to the review of titles and abstracts. Included trials will be managed through Endnote. A PRISMA flow chart will be used to provide transparency of the number of trials included or excluded at each stage.

#### Data Collection Process and Analyses

Two independent researchers (MW, SF) will use a standardised data extraction form developed from the Cochrane Back and Neck group template to record information on participants, trial setting, eligibility criteria, risk of bias assessment, methodology design, Intervention, outcome measures (with special attention on PA adherence measures), assessment time points, PA adherence BCTs within the intervention, the deliverer of BCTs and any training they undertook, and the main trial results<sup>70</sup>.

1  
2  
3 Data extraction will include detail on trial treatment fidelity. Although several checklists exist to  
4 assess intervention fidelity<sup>71 72</sup>, The National Institutes of Health Behaviour Change Consortium's  
5 (NIHBCC) checklist is unique in its focus on behavioural change trials and has demonstrated validity  
6 and reliability<sup>32</sup>. The NIHBCC checklist has 40 components and was developed in 2011<sup>73</sup> from the  
7 initial version which had 25 components<sup>32</sup>. The NIHBCC's checklist comprises 5 domains: 'Treatment  
8 design', 'Training Providers', 'Delivery of Treatment', 'Receipt of Treatment', and 'Enactment of  
9 Treatment skills'. Although Toomey et al., (2015)<sup>33</sup> did not find any association between trial date  
10 and fidelity, the consideration and assessment of fidelity is a relatively contemporary concept and  
11 the scoping search revealed several trials conducted prior, or at a similar time, to the NIHBCC  
12 checklists creation. While it is not the primary research question in this systematic review, trials  
13 treatment fidelity needs to be acknowledged when determining intervention effectiveness.  
14 Therefore, in order not to overtly penalise trials but to aid interpretation, each domain on the  
15 NIHBCC checklist will be judged as 'present' or 'absent' by two independent researchers (MW, SF)  
16 but no score will be given to individual items. These details will be included as part of the narrative  
17 synthesis and interpreted in the discussion when drawing conclusions regarding BCT effectiveness.  
18  
19

20 The data extraction form will be piloted on the full texts of several included RCTs to ensure reliability  
21 and will be altered as necessary to optimise data collection. Any disagreement between researchers  
22 will be resolved through discussion. If agreement cannot be reached, a third reviewer (AR) will  
23 mediate. Where there are multiple reports of the same trial, data will be extracted using separate  
24 forms and collated on a single form subsequently<sup>70</sup>. Trial authors will be contacted by email if  
25 information is missing or unclear.  
26  
27

28 Two independent researchers (MW, SF) will code interventions using the 'Behaviour Change  
29 Taxonomy'<sup>27</sup>. BCTs and their associated hierarchy will be included as a component of the data  
30 extraction. As per training instructions, the associated text and page number will be recorded and  
31 the BCT will be given a 'score' of + (present in all probability) or ++ (present beyond all reasonable  
32  
33  
34  
35  
36  
37  
38  
39  
40  
41  
42  
43  
44  
45  
46  
47  
48  
49  
50  
51  
52  
53  
54  
55  
56  
57  
58  
59  
60

doubt)<sup>74</sup> to facilitate further discussion. Only BCTs that are directed at PA adherence behaviour will be coded<sup>74</sup>. Trials that have available protocols and fidelity papers will also be coded<sup>40</sup>. The researchers will undergo online training on the use of the taxonomy and the coding process will be piloted a priori. To ensure that a 'post learning effect'<sup>75</sup> is minimised, a period of integration will be observed after the training, and coders will meet regularly to minimise discrepancies in taxonomy understanding and enhance agreement. Taxonomy use will be piloted a priori, and coder agreement will be calculated using Cohen's Kappa statistic. Any disagreement between the researchers will be resolved by researcher consensus. In the event that consensus cannot be reached, a third researcher (JD, expertise in subject area of behaviour change) will mediate the decision (Objective 1).

#### **Risk of Bias assessment**

Two independent researchers (MW, SF) will use the Cochrane Risk of Bias tool to assess the internal validity of included trials<sup>76</sup>. The tool was developed by a research working group and is recommended for use in systematic reviews. It uses domain based evaluation rather than a check list or scoring system to assess internal validity<sup>76</sup> and allows review authors space to justify their conclusions<sup>77</sup>. The tool addresses six domains: 'sequence generation', 'allocation concealment', 'blinding', 'incomplete outcome data', and 'selective outcome reporting' and 'other' sources of bias. A judgement of 'High', 'Unclear' or 'Low' risk of bias will be made for each domain. A judgement of 'Unclear' will be allocated to a domain where insufficient information is provided. Trials will be screened for selective outcome reporting by comparing outcomes used in the finalised articles with registered protocols. If no trial protocol exists, outcomes from the trials published methods and results sections will be compared and a judgement of 'unclear' will be allocated<sup>58</sup>. When assessing trials risk of bias, researchers will pay special attention to the 'blinding' domain. Blinding of the treating physiotherapists and trial participants is often problematic however assessor blinding is achievable and important<sup>76</sup>. Therefore, trials will be judged to have overall 'low risk' for the blinding

1  
2  
3 domain if the assessor is adequately blinded<sup>76</sup>. The risk of bias assessment across trials will be  
4  
5 displayed graphically using REVMAN 5.3.  
6  
7  
8  
9

### 10 11 **Data Presentation**

12  
13  
14 A table will be presented that details the BCTs used in each trial. The total number of BCTs  
15  
16 (individually and hierarchal groups) used across trials, their frequency per trial, and how accurately  
17  
18 they were reported will be detailed (Objective 1)<sup>40</sup>. A 'risk of bias' table showing internal validity  
19  
20 decisions within and across trials will also be presented. A 'characteristics of included trials' table  
21  
22 with PICOS data with explicit detail noting:  
23

- 24  
25 • Intervention: fidelity assessment, whether other intervention providers were involved in BCT  
26  
27 delivery, and any training in physiotherapist BCT delivery.
- 28  
29 • Outcomes: Trial's that used a PA adherence measure.  
30  
31

### 32 33 **Data synthesis:**

34  
35 Narrative synthesis will be reported following stages as recommended by Cochrane Qualitative  
36  
37 Research Group<sup>78</sup>.  
38  
39

40  
41 **Developing a preliminary synthesis:** Trials ( $\geq 2$ ) will be grouped together if they are clinically  
42  
43 homogenous as determined by two researchers (MW, SF), based on:  
44

- 45 • Interventions: specific BCTs with or without co-interventions
- 46  
47 • Comparator groups
- 48  
49 • Outcome measure domains<sup>79</sup>  
50

51  
52 The results of groupings will be presented in tables (Objective 1).  
53

54 **Assessing the robustness of the synthesis:** Each table and statement will include information  
55  
56 detailing overall quality of evidence for each grouping. The quality of the body of evidence for each  
57  
58

1  
2  
3 outcome will be evaluated using the GRADE approach (Grading of Recommendations, Assessment,  
4 Development and Evaluation)<sup>80</sup>. GRADE determines overall quality of evidence based on risk of bias,  
5 inconsistency, indirectness, imprecision of results and publication bias<sup>80</sup>. The quality of evidence will  
6 be adjudicated as 'high', 'moderate', 'low' or 'very low' based on the guidance from the GRADE  
7 working group by two researchers (MW, SF)<sup>80</sup>, with a third researcher (AR) asked to mediate if  
8 consensus cannot be reached.

9  
10  
11  
12  
13  
14  
15  
16  
17 **Exploring Relationships within and Between Trials:** Further textual descriptions will accompany the  
18 tables to highlight key points on trial population, BCTs identified and accuracy of reporting,  
19 intervention fidelity assessment, the BCT intervention provider and their training, or outcome  
20 measures that could explain the differences in results as outlined in the tables.

### 21 22 23 24 25 26 27 28 **BCT effectiveness**

29 Individual BCT effectiveness will be determined narratively and supported quantitatively by the use  
30 of its 'percentage effectiveness ratio'<sup>81</sup>. Trial interventions will be categorised as 'effective' or  
31 'ineffective' with effective trials demonstrating a significantly greater effect on PA or adherence  
32 outcome measures when displayed in a forest plot. The ratio will be calculated by dividing the  
33 number of times that the BCT was part of an 'effective' intervention by the number of times the BCT  
34 was used in all trials (Objective 2)<sup>81</sup>.

### 35 36 37 38 39 40 41 42 43 44 45 46 **Meta-analysis**

47 Based on the scoping search, it is anticipated that eligible trials will demonstrate high intervention,  
48 comparator and outcome variability (clinical heterogeneity)<sup>79</sup>. Therefore, when meta-analysis is  
49 indicated, a random effects model will be used to calculate effect sizes based on the groupings  
50 outlined in the narrative synthesis (Objective 2). The risk ratio (RR) with 95% confidence intervals  
51 (CIs) and mean differences (MD) with 95% confidence intervals will be used to measure the

1  
2  
3 treatment effect of dichotomous and continuous outcomes respectively. The standardised mean  
4  
5 difference (SMD) will be used to measure continuous outcomes where several measures are used  
6  
7 within one outcome domain<sup>79</sup>. Where mean data are not available, and trial authors do not respond  
8  
9 to an email request for raw data (a maximum of three follow up emails), the median will be used as  
10  
11 an estimate of the mean<sup>82</sup>.  
12

### 13 14 15 16 **Sensitivity Analysis**

17  
18 A sensitivity analysis will be conducted to determine whether excluding high risk of bias RCTs has  
19  
20 influenced the findings of the meta-analysis to enable further discussion (Objective 2).  
21  
22

### 23 24 25 **Meta-bias**

26  
27 Publication bias will be assessed by use of funnel plots where meta-analysis includes  $\geq 10$  trials<sup>83</sup>.  
28  
29 Meta-analyses will be tested for 'small-study effects' by comparing fixed and random effects sizes  
30  
31 where the random-effects model will show greater intervention effect sizes for trials with smaller  
32  
33 sample sizes<sup>83</sup>.  
34  
35  
36  
37  
38  
39

## 40 **DISCUSSION**

41  
42 OA patients currently display the highest level of individual level disability in the United Kingdom.  
43  
44 Interventions incorporating BCTS have the potential to increase long term patient adherence to PA  
45  
46 recommendations, increasing patient function and quality of life, and physiotherapists are well  
47  
48 placed to deliver them. At present, there is a lack of understanding of specific BCTs used in  
49  
50 physiotherapy interventions when treating OA patients. This review will help identify BCTs currently  
51  
52 being used in physiotherapy clinical practice and recommend those which are the most effective at  
53  
54 reducing lower limb OA symptoms and encouraging long term patient PA adherence. Clinicians will  
55  
56  
57  
58  
59  
60

1  
2  
3 be able to apply the evidence from this systematic review on OA patients by incorporating the most  
4  
5 appropriate BCTs into their interventions to maximise their adherence to PA. This systematic review  
6  
7 will also inform the planning and implementation of a trial to determine the feasibility of an active  
8  
9 behavioural physiotherapy intervention on patients with lower limb osteoarthritis.  
10

## 11 12 13 14 15 **LIMITATIONS**

16  
17  
18 Several heterogeneous interventions, comparison groups, variability of OA severity and time  
19  
20 periods, and a limited number of trials (15-20) are anticipated based on the scoping search. This may  
21  
22 preclude meta-analysis, affecting the overall level of evidence for RCT groupings. Furthermore, the  
23  
24 fidelity assessment and BCTs within interventions may be poorly reported, making it difficult to  
25  
26 determine the effectiveness of individual BCTs with consideration of the degree to which the  
27  
28 intervention was delivered as intended.  
29  
30  
31  
32  
33  
34

## 35 **ETHICS AND DISSEMINATION:**

36  
37  
38 No research ethics approval is required for this systematic review as no confidential patient data will  
39  
40 be used. It is intended that the results of this systematic review will be disseminated through  
41  
42 publication in a peer reviewed journal and conference presentations.  
43  
44  
45  
46  
47

48  
49 **Contributors** All authors conceived the focus of the systematic review. MW is a PhD student and AR  
50  
51 (lead supervisor), JD, and CaG are supervisors. MW drafted the initial version of the protocol  
52  
53 manuscript. AR, CaG and JD provided critical guidance on the direction, methodological decisions,  
54  
55 and proposed analyses. MW developed the search strategy and data extraction form that was  
56  
57  
58  
59  
60



1  
2  
3 piloted by MW and ChG/SF respectively. All authors reviewed and commented on each draft of the  
4  
5 systematic review protocol. MW is the guarantor of the review.  
6  
7

8 **Funding** This research received no specific grant from any funding agency in the public, commercial  
9  
10 or not-for-profit sectors.  
11

12  
13 **Competing interests** None declared  
14

15  
16 **Provenance and peer review** Not commissioned; externally peer reviewed  
17

18  
19 **Data sharing statement** This systematic review protocol was registered with the International  
20  
21 Prospective Register of Systematic Reviews (PROSPERO) on 15/8/2016 Registration number:  
22  
23 CRD42016039932. This protocol has been reported using the Preferred Reporting Items for  
24  
25 Systematic Reviews and Meta-Analyses Protocols (PRISMA-P) guidelines. The final version of this  
26  
27 systematic review and its associated data will be published upon completion.  
28

29  
30  
31 **Open Access** This is an Open Access article distributed in accordance with the Creative Commons  
32  
33 Attribution Non Commercial (CC BY-NC 4.0) license, which permits others to distribute, remix, adapt,  
34  
35 build upon this work non-commercially, and license their derivative works on different terms,  
36  
37 provided the original work is properly cited and the use is non-commercial. See:  
38  
39 <http://creativecommons.org/licenses/by-nc/4.0/>.  
40  
41  
42  
43  
44

#### 45 REFERENCES:

- 46  
47 1. Fernandes L, Hagen KB, Bijlsma JW, et al. EULAR recommendations for the non-pharmacological  
48 core management of hip and knee osteoarthritis. *Ann Rheum Dis* 2013;72(7):1125-35. doi:  
49 10.1136/annrheumdis-2012-202745  
50 2. Helminen EE, Sinikallio SH, Valjakka AL, et al. Effectiveness of a cognitive-behavioural group  
51 intervention for knee osteoarthritis pain: a randomized controlled trial. *Clin Rehabil*  
52 2015;29(9):868-81. doi: 10.1177/0269215514558567  
53 3. NICE. Osteoarthritis. Care and Management in adults. Clinical guideline CG177 Methods, evidence  
54 and recommendations. *National Institute for Health and Care Excellence* 2014;2014  
55 4. Pereira D, Peleteiro B, Araujo J, et al. The effect of osteoarthritis definition on prevalence and  
56 incidence estimates: a systematic review. *Osteoarthritis Cartilage* 2011;19(11):1270-85. doi:  
57 10.1016/j.joca.2011.08.009  
58  
59

- 1  
2  
3 5. Hochberg MC, Altman RD, April KT, et al. American College of Rheumatology 2012  
4 recommendations for the use of nonpharmacologic and pharmacologic therapies in  
5 osteoarthritis of the hand, hip, and knee. *Arthritis Care & Research* 2012;64(4):465-74. doi:  
6 10.1002/acr.21596
- 7  
8 6. McAlindon TE, Bannuru RR, Sullivan MC, et al. OARSI guidelines for the non-surgical management  
9 of knee osteoarthritis. *Osteoarthritis Cartilage* 2014;22(3):363-88. doi:  
10 10.1016/j.joca.2014.01.003
- 11 7. Pisters MF, Veenhof C, de Bakker DH, et al. Behavioural graded activity results in better exercise  
12 adherence and more physical activity than usual care in people with osteoarthritis: a cluster-  
13 randomised trial. *Journal of Physiotherapy* 2010;56(1):41-47. doi: 10.1016/s1836-  
14 9553(10)70053-9
- 15 8. Foster NE, Healey EL, Holden MA, et al. A multicentre, pragmatic, parallel group, randomised  
16 controlled trial to compare the clinical and cost-effectiveness of three physiotherapy-led  
17 exercise interventions for knee osteoarthritis in older adults: the BEEP trial protocol. *BMC*  
18 *Musculoskeletal Disorders* 2014;15:254. doi: 10.1186/1471-2474-15-254
- 19 9. Kroon FPB, Van der Burg L, Buchbinder R, et al. Self-management education programmes for  
20 osteoarthritis (Review). *The Cochrane Library* 2014(1)
- 21 10. Pisters MF, Veenhof C, Schellevis FG, et al. Long-term effectiveness of exercise therapy in  
22 patients with osteoarthritis of the hip or knee: a randomized controlled trial comparing two  
23 different physical therapy interventions. *Osteoarthritis Cartilage* 2010;18(8):1019-26. doi:  
24 10.1016/j.joca.2010.05.008
- 25 11. Bennell KL, Dobson F, Hinman RS. Exercise in osteoarthritis: moving from prescription to  
26 adherence. *Best Pract Res Clin Rheumatol* 2014;28(1):93-117. doi:  
27 10.1016/j.berh.2014.01.009
- 28 12. Beinart NA, Goodchild CE, Weinman JA, et al. Individual and intervention-related factors  
29 associated with adherence to home exercise in chronic low back pain: a systematic review.  
30 *Spine J* 2013;13(12):1940-50. doi: 10.1016/j.spinee.2013.08.027
- 31 13. Bassett SF. The assessment of patient adherence to physiotherapy rehabilitation. *New Zealand*  
32 *Journal of Physiotherapy* 2003;31(2):60-66.
- 33 14. Thorstensson CA, Garellick G, Rystedt H, et al. Better Management of Patients with  
34 Osteoarthritis: Development and Nationwide Implementation of an Evidence-Based  
35 Supported Osteoarthritis Self-Management Programme. *Musculoskeletal Care*  
36 2015;13(2):67-75. doi: 10.1002/msc.1085
- 37 15. Thomas KS, Muir KR, Doherty M, et al. Home based exercise programme for knee pain and knee  
38 osteoarthritis: randomised controlled trial. *BMJ* 2002;325:752-56.
- 39 16. Dunlop DD, Semanik P, Song J, et al. Risk factors for functional decline in older adults with  
40 arthritis. *Arthritis Rheum* 2005;52(4):1274-82. doi: 10.1002/art.20968
- 41 17. Marks R, Allegrante JP. Chronic osteoarthritis and adherence to exercise: a review of the  
42 literature. *Journal of aging and physical activity* 2005;13(4):434-60.
- 43 18. Holden MA, Nicholls EE, Hay EM, et al. Physical therapists' use of therapeutic exercise for  
44 patients with clinical knee osteoarthritis in the United Kingdom: in line with current  
45 recommendations? *Physical Therapy* 2008;88(10):1109-21.
- 46 19. van Gool CH, Penninx BW, Kempen GI, et al. Effects of exercise adherence on physical function  
47 among overweight older adults with knee osteoarthritis. *Arthritis Rheum* 2005;53(1):24-32.  
48 doi: 10.1002/art.20902
- 49 20. Hinman RS, Delany CM, Campbell PK, et al. About Working Together to Promote Exercise  
50 Patients With Knee Osteoarthritis: Qualitative Study Physical Therapists, Telephone Coaches,  
51 and Adherence. *Physical Therapy* 2015;96(4):479-93. doi: 10.2522/ptj.20150260
- 52 21. Terwee CB, Bouwmeester W, van Elsland SL, et al. Instruments to assess physical activity in  
53 patients with osteoarthritis of the hip or knee: a systematic review of measurement  
54 properties. *Osteoarthritis Cartilage* 2011;19(6):620-33. doi: 10.1016/j.joca.2011.01.002
- 55  
56  
57  
58  
59  
60

- 1  
2  
3 22. McLean S, Holden MA, Potia T, et al. Quality and acceptability of measures of exercise adherence  
4 in musculoskeletal settings: a systematic review. *Rheumatology (Oxford)* 2016 doi:  
5 10.1093/rheumatology/kew422  
6  
7 23. Hall AM, Kamper SJ, Hernon M, et al. Measurement tools for adherence to non-pharmacologic  
8 self-management treatment for chronic musculoskeletal conditions: a systematic review.  
9 *Arch Phys Med Rehabil* 2015;96(3):552-62. doi: 10.1016/j.apmr.2014.07.405  
10  
11 24. Michie S, van Stralen MM, West R. The behaviour change wheel: a new method for  
12 characterising and designing behaviour change interventions. *Implement Sci* 2011;6:42. doi:  
13 10.1186/1748-5908-6-42  
14  
15 25. Craig P, Dieppe P, Macintyre S, et al. Developing and evaluating complex interventions: the new  
16 Medical Research Council guidance. *BMJ* 2008;337:a1655. doi: 10.1136/bmj.a1655  
17  
18 26. Michie S, Johnston M, Francis J, et al. From Theory to Intervention: Mapping Theoretically  
19 Derived Behavioural Determinants to Behaviour Change Techniques. *Applied Psychology*  
20 2008;57(4):660-80. doi: 10.1111/j.1464-0597.2008.00341.x  
21  
22 27. Michie S, Richardson M, Johnston M, et al. The behavior change technique taxonomy (v1) of 93  
23 hierarchically clustered techniques: building an international consensus for the reporting of  
24 behavior change interventions. *Ann Behav Med* 2013;46(1):81-95. doi: 10.1007/s12160-013-  
25 9486-6  
26  
27 28. Albarracin D, Gillette JC, Earl AN, et al. A test of major assumptions about behavior change: a  
28 comprehensive look at the effects of passive and active HIV-prevention interventions since  
29 the beginning of the epidemic. *Psychol Bull* 2005;131(6):856-97. doi: 10.1037/0033-  
30 2909.131.6.856  
31  
32 29. Michie S, Abraham C, Whittington C, et al. Effective Techniques in Healthy Eating and Physical  
33 Activity Interventions: A Meta-Regression. *Health Psychology* 2009;28(6):690-701. doi:  
34 10.1037/a0016136.supp  
35  
36 30. NICE. PH49 Behaviour change: individual approaches *National Institute for Health and Care*  
37 *Excellence* 2014  
38  
39 31. Toomey EM, J. Guerin, S. Hurley, D.A. Development of a Feasible Implementation Fidelity  
40 Protocol Within a Complex Physical Therapy– Led Self-Management Intervention *Physical*  
41 *Therapy* 2016;96(8):1287-98.  
42  
43 32. Borrelli B, Sepinwall D, Ernst D, et al. A new tool to assess treatment fidelity and evaluation of  
44 treatment fidelity across 10 years of health behavior research. *J Consult Clin Psychol*  
45 2005;73(5):852-60. doi: 10.1037/0022-006X.73.5.852  
46  
47 33. Toomey E, Currie-Murphy L, Matthews J, et al. Implementation fidelity of physiotherapist-  
48 delivered group education and exercise interventions to promote self-management in  
49 people with osteoarthritis and chronic low back pain: A rapid review Part II. *Manual Therapy*  
50 2015;20:287-94. doi: 10.1016/j.math.2014.10.012  
51  
52 34. Boutron I, Moher D, Altman DG, et al. Extending the CONSORT statement to randomized trials of  
53 non-pharmacologic treatment: Explanation and Elaboration. *Ann Intern Med*  
54 2008;148(4):295-309  
55  
56 35. Craig P, Dieppe P, Macintyre S, et al. Developing and evaluating complex interventions: new  
57 guidance. *Medical Research Council* 2008  
58  
59 36. Hoffmann TC, Glasziou PP, Boutron I, et al. Better reporting of interventions: template for  
60 intervention description and replication (TIDieR) checklist and guide. *BMJ* 2014;348:g1687.  
doi: 10.1136/bmj.g1687  
37. Bird EL, Baker G, Mutrie N, et al. Behavior change techniques used to promote walking and  
cycling: a systematic review. *Health Psychol* 2013;32(8):829-38. doi: 10.1037/a0032078  
38. French DP, Olander EK, Chisholm A, et al. Which behaviour change techniques are most effective  
at increasing older adults' self-efficacy and physical activity behaviour? A systematic review.  
*Ann Behav Med* 2014;48(2):225-34. doi: 10.1007/s12160-014-9593-z

- 1  
2  
3 39. Plow MA, Moore S, Husni ME, et al. A systematic review of behavioural techniques used in  
4 nutrition and weight loss interventions among adults with mobility-impairing neurological  
5 and musculoskeletal conditions. *Obes Rev* 2014;15(12):945-56. doi: 10.1111/obr.12223  
6  
7 40. Keogh A, Tully MA, Matthews J, et al. A review of behaviour change theories and techniques  
8 used in group based self-management programmes for chronic low back pain and arthritis.  
9 *Man Ther* 2015 doi: 10.1016/j.math.2015.03.014  
10  
11 41. O'Brien N, McDonald S, Araujo-Soares V, et al. The features of interventions associated with  
12 long-term effectiveness of physical activity interventions in adults aged 55-70 years: a  
13 systematic review and meta-analysis. *Health Psychol Rev* 2015;9(4):417-33. doi:  
14 10.1080/17437199.2015.1012177  
15  
16 42. Olander EK, Fletcher H, Williams S, et al. What are the most effective techniques in changing  
17 obese individuals' physical activity self-efficacy and behaviour: a systematic review and  
18 meta-analysis. *International Journal of Behavioral Nutrition and Physical Activity* 2013;10(29)  
19  
20 43. Dombrowski SU, Sniehotta FF, Avenell A, et al. Identifying active ingredients in complex  
21 behavioural interventions for obese adults with obesity-related co-morbidities or additional  
22 risk factors for co-morbidities: a systematic review. *Health Psychology Review* 2012;6(1):7-  
23 32. doi: 10.1080/17437199.2010.513298  
24  
25 44. Cradock KA, O'laighin G, Finucane JM, et al. Behaviour change techniques targetting both diet and  
26 physical activity in type 2 diabetes: A systematic review and meta-analysis. *International*  
27 *Journal of Behavioral Nutrition and Physical Activity* 2017;14(18) doi: 10.1136/bmjopen-  
28 2015-010728  
29  
30 45. Heron N, Kee F, Donnelly M, et al. Behaviour change techniques in home-based cardiac  
31 rehabilitation: a systematic review. *Br J Gen Pract* 2016;66(651):e747-57. doi:  
32 10.3399/bjgp16X686617  
33  
34 46. Cramp F, Berry J, Gardiner M, et al. Health behaviour change interventions for the promotion of  
35 physical activity in rheumatoid arthritis: a systematic review. *Musculoskeletal Care*  
36 2013;11(4):238-47. doi: 10.1002/msc.1049  
37  
38 47. Lefebvre C, Manheimer E, Glanville J. Chapter 6: Searching for studies. In: Higgins JPT, Green S  
39 (editors). *Cochrane Handbook for Systematic Reviews of Interventions* Version 5.1.0  
40 (updated March 2011). The Cochrane Collaboration, 2011. Available from  
41 [www.handbook.cochrane.org](http://www.handbook.cochrane.org). 2011  
42  
43 48. Tiffreau V, Mullemanb D, Coudeyrec E, et al. The value of individual or collective group exercise  
44 programs for knee or hip osteoarthritis. Elaboration of French clinical practice guidelines.  
45 *Annales de réadaptation et de médecine physique* 2007;50:741-46. doi:  
46 10.1016/j.annrmp.2007.10.001  
47  
48 49. Jordan JL, Holden MA, Mason EEJ, et al. Interventions to improve adherence to exercise for  
49 chronic musculoskeletal pain in adults. *The Cochrane Library* 2010(1) doi:  
50 10.1002/14651858.CD005956.pub2  
51  
52 50. Fransen M, McConnell S, Harmer AR, et al. Exercise for osteoarthritis of the knee. *Cochrane*  
53 *Database of Systematic Reviews* 2015;2015(1) doi: 10.1002/14651858.CD004376.pub3.  
54  
55 51. Chan DK, Lonsdale C, Ho PY, et al. Patient motivation and adherence to postsurgery  
56 rehabilitation exercise recommendations: the influence of physiotherapists' autonomy-  
57 supportive behaviors. *Arch Phys Med Rehabil* 2009;90(12):1977-82. doi:  
58 10.1016/j.apmr.2009.05.024  
59  
60 52. DOH. The NHS knowledge skills framework and the development review process. *NHS* 2004;2004  
53 53. HCPC. Standards of proficiency for physiotherapists. *NHS* 2013;2013:1-18.  
54 54. Alexanders J, Anderson A, Henderson S. Musculoskeletal physiotherapists' use of psychological  
55 interventions: a systematic review of therapists' perceptions and practice. *Physiotherapy*  
56 2015;101(2):95-102. doi: 10.1016/j.physio.2014.03.008

- 1  
2  
3 55. McGrane N, Galvin R, Cusack T, et al. Addition of motivational interventions to exercise and  
4 traditional physiotherapy: a review and meta-analysis. *Physiotherapy* 2015;101(1):1-12. doi:  
5 10.1016/j.physio.2014.04.009  
6  
7 56. Ghogomu EA, Maxwell LJ, Buchbinder R, et al. Updated method guidelines for cochrane  
8 musculoskeletal group systematic reviews and metaanalyses. *J Rheumatol* 2014;41(2):194-  
9 205. doi: 10.3899/jrheum.121306  
10  
11 57. CRD. Centre for Reviews and Dissemination (CRD). *Systematic reviews: CRD's guidance for*  
12 *undertaking reviews in healthcare*. 3rd ed. York: CRD University of York, York Publishing  
13 Services Ltd; 2009. 2009  
14  
15 58. Shamseer L, Moher D, Clarke M, et al. Preferred reporting items for systematic review and meta-  
16 analysis protocols (PRISMA-P) 2015: elaboration and explanation. *BMJ* 2015;349:g7647. doi:  
17 10.1136/bmj.g7647  
18  
19 59. McAlindon TE, Driban JB, Henrotin Y, et al. OARSI Clinical Trials Recommendations: Design,  
20 conduct, and reporting of clinical trials for knee osteoarthritis. *Osteoarthritis Cartilage*  
21 2015;23(5):747-60. doi: 10.1016/j.joca.2015.03.005  
22  
23 60. Brand E, Nyland J, Henzman C, et al. Arthritis Self-Efficacy Scale scores in knee osteoarthritis: a  
24 systematic review and meta-analysis comparing arthritis self-management education with or  
25 without exercise. *Journal of Orthopaedic and Sports Physiotherapy* 2013;43(12):895-910.  
26 doi: 10.2519/  
27  
28 61. Dobson F, Bennell K, French S. Barriers and Facilitators to Exercise Participation in People with  
29 Hip and/or Knee Osteoarthritis: Synthesis of the Literature Using Behavior Change Theory.  
30 *American Journal of physical medicine and rehabilitation* 2016;95(5)  
31  
32 62. Marley J, Tully MA, Porter-Armstrong A, et al. A systematic review of interventions aimed at  
33 increasing physical activity in adults with chronic musculoskeletal pain: protocol. *Systematic*  
34 *Reviews* 2014;3(1):106.  
35  
36 63. Fransen M, McConnell S, Hernandez-Molina G, et al. Exercise for osteoarthritis of the hip  
37 *Cochrane Database of Systematic Reviews* 2014;2014(4) doi:  
38 10.1002/14651858.CD007912.pub2.  
39  
40 64. French HP, Galvin RP, Abbott JH, et al. Adjunctive therapies in addition to land-based exercise  
41 therapy for osteoarthritis of the hip or knee (Protocol). *The Cochrane Library* 2015(10)  
42  
43 65. Toomey E, Currie-Murphy L, Matthews J, et al. The effectiveness of physiotherapist-delivered  
44 group education and exercise interventions to promote self-management for people with  
45 osteoarthritis and chronic low back pain: a rapid review part I. *Man Ther* 2015;20(2):265-86.  
46 doi: 10.1016/j.math.2014.10.013  
47  
48 66. Veenhof C, Koke AJ, Dekker J, et al. Effectiveness of behavioral graded activity in patients with  
49 osteoarthritis of the hip and/or knee: A randomized clinical trial. *Arthritis Rheum*  
50 2006;55(6):925-34. doi: 10.1002/art.22341  
51  
52 67. Wong SS, Wilczynski NL, Haynes RB. Developing optimal search strategies for detecting clinically  
53 sound treatment studies in EMBASE. *Journal of the Medical Library Association*  
54 2006;94(1):41-47.  
55  
56 68. Wong SS, Wilczynski NL, Haynes RB. Optimal CINAHL search strategies for identifying therapy  
57 studies and review articles. *Journal of Nursing Scholarship* 2006;38(2):194-9.  
58  
59 69. Eady AM, Wilczynski NL, Haynes RB. PsycINFO search strategies identified methodologically  
60 sound therapy studies and review articles for use by clinicians and researchers. *Journal of*  
*Clinical Epidemiology* 2008;61(1):34-40.  
70. Higgins JPT, Deeks JJ. Chapter 7: Selecting studies and collecting data. In: Higgins JPT, Green S  
(editors), *Cochrane Handbook for Systematic Reviews of Interventions* Version 5.1.0  
(updated March 2011). The Cochrane Collaboration, 2011. Available  
from:[www.handbook.cochrane.org](http://www.handbook.cochrane.org). 2011  
71. Carroll C, Patterson M, Wood S, et al. A conceptual framework for implementation fidelity.  
*Implement Sci* 2007;2:40. doi: 10.1186/1748-5908-2-40



- 1  
2  
3 72. Gearing RE, El-Bassel N, Ghesquiere A, et al. Major ingredients of fidelity: a review and scientific  
4 guide to improving quality of intervention research implementation. *Clin Psychol Rev*  
5 2011;31(1):79-88. doi: 10.1016/j.cpr.2010.09.007  
6  
7 73. Borrelli B. The Assessment, Monitoring, and Enhancement of Treatment Fidelity In Public Health  
8 Clinical Trials. *J Public Health Dent* 2011;71(s1):S52-S63. doi: 10.1111/j.1752-  
9 7325.2011.00233.x  
10  
11 74. Michie S, Johnston M, Abraham C, et al. BCT Taxonomy: Starter Pack For trainees. 2014  
12 75. Wood CE, Hardeman W, Johnston M, et al. Reporting behaviour change interventions: do the  
13 behaviour change technique taxonomy v1, and training in its use, improve the quality of  
14 intervention descriptions? *Implement Sci* 2016;11(84) doi: 10.2519/  
15  
16 76. Higgins JPT, Altman DG, Sterne JAC. Chapter 8: Assessing risk of bias in included studies. In:  
17 Higgins JPT, Green S (editors). *Cochrane Handbook for Systematic Reviews of Interventions*  
18 Version 5.1.0 (updated March 2011). The Cochrane Collaboration, 2011. Available  
19 from:[www.handbook.cochrane.org](http://www.handbook.cochrane.org). 2011  
20  
21 77. Liberati A, Altman DG, Tetzlaff J, et al. The PRISMA statement for reporting systematic reviews  
22 and meta-analyses of studies that evaluate healthcare interventions: explanation and  
23 elaboration. *BMJ* 2009;339:b2700. doi: 10.1136/bmj.b2700  
24  
25 78. Popay J, Roberts H, Sowden A, et al. Guidance on the conduct of narrative synthesis in systematic  
26 reviews. A Product from the ESRC Methods Programme. Version 1. *ESRC* 2006:1-91.  
27  
28 79. Deeks JJ, Higgins JPT, Altman DG. (editors). Chapter 9: Analysing data and undertaking meta-  
29 analyses. In: Higgins JPT, Green S (editors). *Cochrane Handbook for Systematic Reviews of*  
30 *Interventions* Version 5.1.0 (updated March 2011). The Cochrane Collaboration, 2011.  
31 Available from [www.handbook.cochrane.org](http://www.handbook.cochrane.org). 2011  
32  
33 80. Schünemann HJ, Oxman AD, Vist GE, et al. Chapter 12: Interpreting results and drawing  
34 conclusions. In: Higgins JPT, Green S (editors), *Cochrane Handbook for Systematic Reviews of*  
35 *Interventions* Version 5.1.0 (updated March 2011). The Cochrane Collaboration, 2011.  
36 Available from [www.handbook.cochrane.org](http://www.handbook.cochrane.org).  
37  
38 81. Martin J, Chater A, Lorencatto F. Effective behaviour change techniques in the prevention and  
39 management of childhood obesity. *Int J Obes (Lond)* 2013;37(10):1287-94. doi:  
40 10.1038/ijo.2013.107  
41  
42 82. Hozo SP, Djulbegovic B, Hozo I. Estimating the mean and variance from the median, range, and  
43 the size of a sample. *BMC Med Res Methodol* 2005;5:13. doi: 10.1186/1471-2288-5-13  
44  
45 83. Sterne JA, Sutton AJ, Ioannidis JP, et al. Recommendations for examining and interpreting funnel  
46 plot asymmetry in meta-analyses of randomised controlled trials. *BMJ* 2011;343:d4002. doi:  
47 10.1136/bmj.d4002  
48  
49  
50  
51  
52  
53  
54  
55  
56  
57  
58  
59  
60

## RESEARCH CHECKLIST

**PRISMA-P (Preferred Reporting Items for Systematic review and Meta-Analysis Protocols) 2015 checklist: recommended items to address in a systematic review protocol\***

| Section and topic                 | Item No | Checklist item                                                                                                                                                                                                                                           |
|-----------------------------------|---------|----------------------------------------------------------------------------------------------------------------------------------------------------------------------------------------------------------------------------------------------------------|
| <b>ADMINISTRATIVE INFORMATION</b> |         |                                                                                                                                                                                                                                                          |
| Title:                            |         |                                                                                                                                                                                                                                                          |
| Identification                    | 1a      | Identify the report as a protocol of a systematic review: <b>Included on page 1, 2, 7, 17</b>                                                                                                                                                            |
| Update                            | 1b      | If the protocol is for an update of a previous systematic review, identify as such <b>N/A</b>                                                                                                                                                            |
| Registration                      | 2       | If registered, provide the name of the registry (such as PROSPERO) and registration number: <b>Included on Page 1,2,18</b>                                                                                                                               |
| Authors:                          |         |                                                                                                                                                                                                                                                          |
| Contact                           | 3a      | Provide name, institutional affiliation, e-mail address of all protocol authors; provide physical mailing address of corresponding author: <b>Included on Page 1</b>                                                                                     |
| Contributions                     | 3b      | Describe contributions of protocol authors and identify the guarantor of the review: <b>Included on Page 16, 17</b>                                                                                                                                      |
| Amendments                        | 4       | If the protocol represents an amendment of a previously completed or published protocol, identify as such and list changes; otherwise, state plan for documenting important protocol amendment: <b>N/A</b>                                               |
| Support:                          |         |                                                                                                                                                                                                                                                          |
| Sources                           | 5a      | Indicate sources of financial or other support for the review: <b>Included on Page 18</b>                                                                                                                                                                |
| Sponsor                           | 5b      | Provide name for the review funder and/or sponsor: <b>N/A</b>                                                                                                                                                                                            |
| Role of sponsor or funder         | 5c      | Describe roles of funder(s), sponsor(s), and/or institution(s), if any, in developing the protocol: <b>N/A</b>                                                                                                                                           |
| <b>INTRODUCTION</b>               |         |                                                                                                                                                                                                                                                          |
| Rationale                         | 6       | Describe the rationale for the review in the context of what is already known: <b>Included pages 3-7</b>                                                                                                                                                 |
| Objectives                        | 7       | Provide an explicit statement of the question(s) the review will address with reference to participants, interventions, comparators, and outcomes (PICO): <b>Included pages 7-9</b>                                                                      |
| <b>METHODS</b>                    |         |                                                                                                                                                                                                                                                          |
| Eligibility criteria              | 8       | Specify the study characteristics (such as PICO, study design, setting, time frame) and report characteristics (such as years considered, language, publication status) to be used as criteria for eligibility for the review: <b>Included pages 7-9</b> |
| Information sources               | 9       | Describe all intended information sources (such as electronic databases, contact with study authors, trial registers or other grey literature sources) with planned dates of coverage: <b>Included on pages 9</b>                                        |
| Search strategy                   | 10      | Present draft of search strategy to be used for at least one electronic database, including planned limits, such that it could                                                                                                                           |

24

|                                    |     |                                                                                                                                                                                                                                                                                   |
|------------------------------------|-----|-----------------------------------------------------------------------------------------------------------------------------------------------------------------------------------------------------------------------------------------------------------------------------------|
|                                    |     | be repeated: <b>Included Pages 10-11</b>                                                                                                                                                                                                                                          |
| Study records:                     |     |                                                                                                                                                                                                                                                                                   |
| Data management                    | 11a | Describe the mechanism(s) that will be used to manage records and data throughout the review: <b>Included on Page 10,11</b>                                                                                                                                                       |
| Selection process                  | 11b | State the process that will be used for selecting studies (such as two independent reviewers) through each phase of the review (that is, screening, eligibility and inclusion in meta-analysis): <b>Included on pages 11-13, 15</b>                                               |
| Data collection process            | 11c | Describe planned method of extracting data from reports (such as piloting forms, done independently, in duplicate), any processes for obtaining and confirming data from investigators: <b>Included on pages 11,12</b>                                                            |
| Data items                         | 12  | List and define all variables for which data will be sought (such as PICO items, funding sources), any pre-planned data assumptions and simplifications: <b>Included on pages 12,13</b>                                                                                           |
| Outcomes and prioritization        | 13  | List and define all outcomes for which data will be sought, including prioritization of main and additional outcomes, with rationale: <b>Included Page 4,5,8,14</b>                                                                                                               |
| Risk of bias in individual studies | 14  | Describe anticipated methods for assessing risk of bias of individual studies, including whether this will be done at the outcome or study level, or both; state how this information will be used in data synthesis: <b>Included pages 13-16</b>                                 |
| Data synthesis                     | 15a | Describe criteria under which study data will be quantitatively synthesised: <b>Included Pages 15,16</b>                                                                                                                                                                          |
|                                    | 15b | If data are appropriate for quantitative synthesis, describe planned summary measures, methods of handling data and methods of combining data from studies, including any planned exploration of consistency (such as $I^2$ , Kendall's $\tau$ ): <b>Included on Pages 15, 16</b> |
|                                    | 15c | Describe any proposed additional analyses (such as sensitivity or subgroup analyses, meta-regression): <b>Included on Page 16</b>                                                                                                                                                 |
|                                    | 15d | If quantitative synthesis is not appropriate, describe the type of summary planned: <b>Included page 14,15.</b>                                                                                                                                                                   |
| Meta-bias(es)                      | 16  | Specify any planned assessment of meta-bias(es) (such as publication bias across studies, selective reporting within studies): <b>Included pages 16</b>                                                                                                                           |
| Confidence in cumulative evidence  | 17  | Describe how the strength of the body of evidence will be assessed (such as GRADE): <b>Included on pages 14,15</b>                                                                                                                                                                |

**\* It is strongly recommended that this checklist be read in conjunction with the PRISMA-P Explanation and Elaboration (cite when available) for important clarification on the items. Amendments to a review protocol should be tracked and dated. The copyright for PRISMA-P (including checklist) is held by the PRISMA-P Group and is distributed under a Creative Commons Attribution Licence 4.0.**

*From: Shamseer L, Moher D, Clarke M, Ghersi D, Liberati A, Petticrew M, Shekelle P, Stewart L, PRISMA-P Group. Preferred reporting items for systematic review and meta-analysis protocols (PRISMA-P) 2015: elaboration and explanation. BMJ. 2015 Jan 2;349(jan02 1):g7647.*
